# Supplementary material for: COVID-19 immune signatures in Uganda persist in HIV co-infection and diverge by pandemic phase
Source: PubMed Central journal article supplement (PMC10874401; doi:10.1038/s41467-024-45204-3), 2024-02-17
Supplement: 41467_2024_45204_MOESM1_ESM.pdf [file 41467_2024_45204_MOESM1_ESM.pdf]

## Supplemental Information

Members of the Collaboration for Clinical and Laboratory Characterization of COVID-19 in Uganda are as follows: **National Influenza Centre, Department of Arbovirology, Emerging and Re-emerging Infectious Diseases, Uganda Virus Research Institute, Entebbe, Uganda** (Barnabas Bakamutumaho, Nicholas Owor, John Kayiwa, Mercy Haumba, Joyce Namulondo, Timothy Byaruhanga, Julius J. Lutwama, Joweria Nakaseegu, Jocelyn Kiconco, Annet Nankya, Irene Ataliba, Samuel Wavamuno); **Viral Hemorrhagic Fever Program, Uganda Virus Research Institute, Entebbe, Uganda** (Stephen Balinandi, Luke Nyakaruhuka, Jimmy Baluku, Alex Tumusiime, Jackson Kyondo, Sophia Mulei, Kilama Kamugisha, Gloria Akurut, Diana Nahamya); **Immunisable Diseases Unit/Expanded Programme on Immunisation Laboratory, Uganda Virus Research Institute, Entebbe, Uganda** (Peter Eliku, Phiona Tushabe, Joshua Buule, Joseph Gaizi, Prossy Namuwulya, Arnold Mugaga, Mary Nyacho, Henry Bukenya, Josephine Bwogi); **European and Developing Countries Clinical Trials Partnership-Eastern Africa Consortium for Clinical Research, Uganda Virus Research Institute, Entebbe, Uganda** (Benjamin Watyaba, Bernard Kikaire); **Entebbe Regional Referral Hospital, Entebbe, Uganda** (Moses Muwanga, Christopher Nsereko, Emmanuel Rwamutwe, Irene Nayiga, Stephen Kyebambe, Roselyn Mutonyi, Josephine Achan, Lucy Wanyenze, Alice Ndzarwe, Joseph Shinyale, Ruth Nakanjako, Richard Natuhwera, Annet Nsangi); **Uganda Peoples' Defence Forces, Kampala, Uganda and Ministry of Health, Kampala, Uganda** (Henry Kyobe Bosa); **Ministry of Health, Kampala, Uganda** (Felix Ocom); **Makerere University School of Public Health, Kampala, Uganda** (Noah Kiwanuka, Stevens Kisaka, James Arinaitwe); **Division of Pulmonary, Allergy, and Critical Care Medicine, Department of Medicine, Vagelos College of Physicians and Surgeons; Center for Infection and Immunity, Department of Epidemiology, Mailman School of Public Health; Columbia University, New York, NY, USA** (Max R. O'Donnell, Matthew J. Cummings).

## Supplemental Methods

### Classification of COVID-19 severity (based on World Health Organization criteria applicable to resource-limited settings<sup>17</sup>)

| Severity Classification           | Criteria                                                                                                                                                                                                                                   |
|-----------------------------------|--------------------------------------------------------------------------------------------------------------------------------------------------------------------------------------------------------------------------------------------|
| Asymptomatic SARS-CoV-2 infection | Absence of all the following symptoms: fever, night sweats, cough, headache, sore throat, runny nose/rhinorrhea, shortness of breath, <i>plus</i> no signs of respiratory distress (chest indrawing, nasal flaring, grunting respirations) |
| Mild COVID-19                     | ≥1 of the above symptoms in the absence of shortness of breath and signs of respiratory distress, <i>plus</i> oxygen saturation >90%, respiratory rate <30 breaths/min, and no receipt of oxygen therapy.                                  |
| Moderate COVID-19                 | ≥1 of the above symptoms <i>plus</i> shortness of breath, <i>without</i> signs of respiratory distress and oxygen saturation >90%, respiratory rate <30 breaths/min, and no receipt of oxygen therapy.                                     |
| Severe COVID-19                   | ≥1 of the following: (1) oxygen saturation ≤90%, (2) respiratory rate ≥30 breaths/minute, (3) ≥1 sign of respiratory distress, (4) receipt of oxygen-therapy.                                                                              |

## Supplemental Tables

Supplemental Table 1: Immune mediator concentrations stratified by COVID-19 severity.

| Mediator <sup>a</sup> | All patients<br>N=306 | Asymptomatic<br>N=66 | Mild<br>N=149        | Moderate<br>N=21     | Severe<br>N=70       | p-value <sup>b</sup> |
|-----------------------|-----------------------|----------------------|----------------------|----------------------|----------------------|----------------------|
| sCD40L                | 3.77 [3.38, 3.99]     | 3.71 [3.19, 3.93]    | 3.73 [3.41, 3.95]    | 3.93 [3.74, 4.02]    | 3.86 [3.37, 4.06]    | 0.105                |
| EGF                   | 2.28 [1.95, 2.57]     | 2.32 [2.01, 2.67]    | 2.20 [1.84, 2.52]    | 2.40 [2.06, 2.55]    | 2.35 [2.09, 2.61]    | 0.139                |
| Eotaxin               | 1.47 [1.24, 1.62]     | 1.48 [1.34, 1.60]    | 1.49 [1.23, 1.63]    | 1.52 [1.32, 1.65]    | 1.41 [1.17, 1.63]    | 0.506                |
| FGF-2                 | 1.81 [1.51, 2.11]     | 1.84 [1.50, 2.14]    | 1.75 [1.49, 2.09]    | 2.03 [1.73, 2.47]    | 1.83 [1.60, 2.09]    | 0.121                |
| FLT-3L                | 1.38 [1.11, 1.62]     | 1.37 [1.13, 1.59]    | 1.38 [1.09, 1.62]    | 1.51 [1.25, 1.73]    | 1.37 [1.15, 1.62]    | 0.648                |
| Fractalkine           | 2.09 [1.95, 2.29]     | 2.10 [1.97, 2.26]    | 2.04 [1.91, 2.27]    | 2.35 [2.12, 2.75]    | 2.15 [1.99, 2.33]    | <0.001               |
| G-CSF <sup>c</sup>    | -0.18 [-0.18, 1.30]   | -0.18 [-0.18, 1.18]  | -0.18 [-0.18, 1.26]  | -0.18 [-0.18, 1.49]  | 0.86 [-0.18, 1.52]   | 0.096                |
| GM-CSF <sup>c</sup>   | -1.00 [-1.00, -1.00]  | -1.00 [-1.00, -1.00] | -1.00 [-1.00, -1.00] | -1.00 [-1.00, -1.00] | -1.00 [-1.00, -1.00] | 0.062                |
| GRO- $\alpha$ /CXCL1  | 2.01 [1.83, 2.17]     | 2.02 [1.82, 2.15]    | 2.02 [1.81, 2.16]    | 2.01 [1.89, 2.14]    | 2.00 [1.87, 2.22]    | 0.865                |
| IFN- $\alpha$ 2       | 1.82 [1.61, 2.04]     | 1.80 [1.51, 1.99]    | 1.81 [1.60, 2.03]    | 1.89 [1.60, 2.55]    | 1.83 [1.71, 2.03]    | 0.352                |
| IFN- $\gamma$         | -0.08 [-1.40, 0.69]   | -0.37 [-1.40, 0.67]  | -0.14 [-1.40, 0.62]  | 0.29 [-1.40, 1.21]   | 0.02 [-1.30, 0.69]   | 0.209                |
| IL-1 $\alpha$         | 1.41 [1.15, 1.77]     | 1.42 [1.17, 1.80]    | 1.41 [1.10, 1.73]    | 1.77 [1.24, 2.34]    | 1.36 [1.19, 1.66]    | 0.175                |
| IL-1 $\beta$          | 1.44 [1.09, 1.78]     | 1.41 [1.07, 1.74]    | 1.39 [1.05, 1.75]    | 1.81 [1.16, 2.24]    | 1.48 [1.15, 1.79]    | 0.185                |
| IL-1Ra                | 0.86 [0.54, 1.31]     | 0.81 [0.50, 1.19]    | 0.72 [0.49, 1.12]    | 1.38 [0.76, 1.63]    | 1.14 [0.77, 1.63]    | <0.001               |
| IL-2                  | 0.01 [-0.62, 0.53]    | -0.03 [-0.86, 0.59]  | -0.02 [-0.62, 0.53]  | 0.26 [-0.23, 1.26]   | 0.02 [-0.50, 0.39]   | 0.307                |
| IL-3 <sup>c</sup>     | -2.00 [-2.00, -2.00]  | -2.00 [-2.00, -2.00] | -2.00 [-2.00, -2.00] | -2.00 [-2.00, -2.00] | -2.00 [-2.00, -0.77] | 0.009                |
| IL-4                  | 0.20 [-0.11, 0.46]    | 0.13 [-0.20, 0.39]   | 0.10 [-0.28, 0.39]   | 0.28 [0.08, 0.53]    | 0.40 [0.17, 0.61]    | <0.001               |
| IL-5                  | 0.71 [0.28, 1.12]     | 0.99 [0.52, 1.46]    | 0.72 [0.29, 1.07]    | 0.78 [0.24, 1.10]    | 0.50 [0.15, 1.00]    | 0.002                |
| IL-6                  | 0.49 [0.10, 1.13]     | 0.42 [0.09, 0.97]    | 0.33 [0.03, 0.69]    | 0.79 [0.24, 1.22]    | 1.01 [0.55, 1.45]    | <0.001               |
| IL-7                  | 0.84 [0.51, 1.08]     | 0.69 [0.36, 0.97]    | 0.73 [0.43, 0.97]    | 0.87 [0.60, 1.06]    | 1.24 [0.93, 1.59]    | <0.001               |
| IL-8                  | 1.78 [1.26, 2.37]     | 1.96 [1.26, 2.55]    | 1.73 [1.21, 2.22]    | 2.00 [1.37, 2.53]    | 1.67 [1.29, 2.47]    | 0.356                |
| IL-9                  | 0.59 [-0.33, 0.94]    | 0.59 [-0.33, 0.95]   | 0.51 [-0.33, 0.87]   | 0.87 [0.51, 1.17]    | 0.69 [-0.10, 0.98]   | 0.017                |
| IL-10                 | 0.60 [0.02, 1.16]     | 0.39 [-0.25, 0.85]   | 0.52 [-0.17, 0.85]   | 0.64 [0.38, 0.95]    | 1.24 [0.71, 1.58]    | <0.001               |
| IL-12p40              | 1.64 [1.27, 1.91]     | 1.72 [1.34, 1.92]    | 1.66 [1.39, 1.90]    | 1.89 [1.27, 2.22]    | 1.38 [0.96, 1.84]    | 0.010                |
| IL-12p70              | 0.42 [0.29, 0.62]     | 0.47 [0.17, 0.64]    | 0.40 [0.26, 0.60]    | 0.56 [0.35, 0.83]    | 0.42 [0.33, 0.66]    | 0.206                |
| IL-13                 | 1.86 [1.65, 2.18]     | 1.85 [1.63, 2.24]    | 1.81 [1.60, 2.10]    | 2.03 [1.81, 2.57]    | 1.98 [1.75, 2.18]    | 0.018                |
| IL-15                 | 1.34 [1.11, 1.63]     | 1.28 [1.06, 1.53]    | 1.25 [1.03, 1.44]    | 1.44 [1.26, 1.90]    | 1.66 [1.36, 1.84]    | <0.001               |
| IL-17A                | 0.97 [0.57, 1.41]     | 0.94 [0.56, 1.56]    | 0.97 [0.53, 1.34]    | 1.21 [0.71, 1.79]    | 0.86 [0.60, 1.36]    | 0.259                |
| IL-17E/IL-25          | 2.55 [2.27, 2.77]     | 2.55 [2.16, 2.82]    | 2.48 [2.18, 2.72]    | 2.74 [2.48, 2.97]    | 2.62 [2.39, 2.77]    | 0.030                |
| IL-17F                | 0.83 [-0.25, 1.49]    | 0.42 [-0.25, 1.62]   | 0.78 [-0.25, 1.40]   | 0.70 [-0.25, 1.54]   | 1.12 [0.54, 1.52]    | 0.044                |
| IL-18                 | 1.68 [1.41, 1.93]     | 1.48 [1.20, 1.84]    | 1.66 [1.40, 1.92]    | 1.73 [1.47, 1.94]    | 1.79 [1.59, 2.08]    | 0.001                |
| IL-22                 | 1.81 [1.35, 2.06]     | 1.82 [1.43, 1.99]    | 1.70 [0.84, 1.99]    | 1.86 [1.71, 2.28]    | 1.95 [1.66, 2.13]    | 0.001                |
| IL-27                 | 3.15 [2.89, 3.37]     | 3.05 [2.86, 3.34]    | 3.14 [2.88, 3.35]    | 3.22 [2.96, 3.41]    | 3.28 [2.94, 3.50]    | 0.061                |
| IP-10/CXCL10          | 2.25 [1.96, 2.60]     | 2.00 [1.82, 2.25]    | 2.24 [1.97, 2.51]    | 2.30 [1.98, 2.54]    | 2.82 [2.30, 3.78]    | <0.001               |
| MCP-1                 | 2.35 [2.19, 2.48]     | 2.34 [2.22, 2.47]    | 2.36 [2.20, 2.47]    | 2.31 [2.10, 2.55]    | 2.35 [2.17, 2.52]    | 0.955                |
| MCP-3                 | 1.24 [1.08, 1.55]     | 1.18 [1.05, 1.54]    | 1.18 [1.06, 1.38]    | 1.74 [1.25, 2.07]    | 1.36 [1.15, 1.71]    | <0.001               |
| M-CSF                 | 2.14 [1.87, 2.42]     | 2.08 [1.86, 2.51]    | 2.08 [1.78, 2.32]    | 2.25 [1.99, 2.48]    | 2.34 [2.11, 2.60]    | <0.001               |
| MDC                   | 3.03 [2.85, 3.20]     | 3.04 [2.93, 3.22]    | 3.11 [2.95, 3.24]    | 3.00 [2.86, 3.13]    | 2.81 [2.61, 2.96]    | <0.001               |
| MIG/CXCL9             | 3.47 [3.24, 3.67]     | 3.44 [3.22, 3.63]    | 3.42 [3.22, 3.57]    | 3.50 [3.14, 3.68]    | 3.67 [3.38, 3.89]    | <0.001               |
| MIP-1 $\alpha$ /CCL3  | 1.67 [1.45, 2.22]     | 1.73 [1.51, 2.40]    | 1.58 [1.40, 2.22]    | 1.73 [1.65, 2.19]    | 1.63 [1.49, 1.92]    | 0.156                |
| MIP-1 $\beta$ /CCL4   | 1.83 [1.64, 2.07]     | 1.89 [1.72, 2.14]    | 1.80 [1.63, 2.00]    | 2.04 [1.77, 2.31]    | 1.84 [1.62, 2.10]    | 0.052                |
| PDGF-AA               | 3.53 [3.39, 3.69]     | 3.49 [3.36, 3.68]    | 3.50 [3.38, 3.66]    | 3.64 [3.46, 3.73]    | 3.62 [3.43, 3.76]    | 0.046                |
| PDGF-AB/BB            | 4.47 [4.42, 4.52]     | 4.48 [4.44, 4.53]    | 4.48 [4.42, 4.52]    | 4.51 [4.44, 4.58]    | 4.45 [4.39, 4.51]    | 0.006                |
| RANTES/CCL5           | 3.37 [3.23, 3.48]     | 3.30 [3.18, 3.46]    | 3.37 [3.26, 3.47]    | 3.33 [3.16, 3.51]    | 3.40 [3.28, 3.53]    | 0.088                |
| TGF- $\alpha$         | 1.07 [0.76, 1.47]     | 1.03 [0.64, 1.45]    | 0.90 [0.67, 1.21]    | 0.97 [0.90, 1.59]    | 1.48 [1.14, 1.71]    | <0.001               |
| TNF                   | 1.81 [1.64, 2.03]     | 1.71 [1.59, 2.02]    | 1.77 [1.62, 1.94]    | 1.94 [1.69, 2.37]    | 1.94 [1.76, 2.17]    | <0.001               |
| Lymphotoxin- $\alpha$ | 1.37 [1.14, 1.65]     | 1.29 [1.15, 1.50]    | 1.24 [1.05, 1.48]    | 1.54 [1.25, 1.90]    | 1.60 [1.32, 1.80]    | <0.001               |
| VEGF-A                | 2.57 [2.31, 2.82]     | 2.56 [2.19, 2.71]    | 2.50 [2.19, 2.74]    | 2.63 [2.40, 2.89]    | 2.83 [2.56, 3.03]    | <0.001               |

Legend: <sup>a</sup>Mediator concentrations presented as log<sub>10</sub> pg/ml with median and interquartile range; <sup>b</sup>Reflects results of Kruskal-Wallis H test; <sup>c</sup>Large proportion of values below the lower limit of quantification (see Supplemental Table 15).

**Supplemental Table 2: Association between COVID-19 severity and immune mediator concentrations in proportional odds models adjusted for age, sex, HIV co-infection, and SARS-CoV-2 variant phase (N=306).**

| Mediator             | $\beta$ (95% CI) <sup>a</sup> | Nominal p-value | BH-adjusted p-value |
|----------------------|-------------------------------|-----------------|---------------------|
| sCD40L               | 0.279 (-0.068 to 0.627)       | 0.115           | 0.197               |
| EGF                  | -0.014 (-0.448 to 0.420)      | 0.949           | 0.949               |
| Eotaxin              | 0.122 (-0.569 to 0.814)       | 0.729           | 0.778               |
| FGF-2                | 0.099 (-0.307 to 0.505)       | 0.633           | 0.723               |
| FLT-3L               | 0.110 (-0.396 to 0.616)       | 0.671           | 0.749               |
| Fractalkine          | 0.599 (-0.075 to 1.274)       | 0.082           | 0.164               |
| G-CSF <sup>b</sup>   | 0.268 (0.010 to 0.526)        | 0.041           | 0.112               |
| GM-CSF <sup>b</sup>  | 0.254 (-0.002 to 0.511)       | 0.052           | 0.131               |
| GRO $\alpha$ /CXCL1  | 0.285 (-0.510 to 1.080)       | 0.482           | 0.578               |
| IFN- $\alpha$ 2      | 0.317 (-0.114 to 0.747)       | 0.150           | 0.219               |
| IFN- $\gamma$        | 0.149 (-0.052 to 0.350)       | 0.146           | 0.219               |
| IL-1 $\alpha$        | 0.075 (-0.296 to 0.446)       | 0.691           | 0.754               |
| IL-1 $\beta$         | 0.139 (-0.232 to 0.510)       | 0.464           | 0.571               |
| IL-1Ra               | 0.500 (0.133 to 0.867)        | 0.008           | 0.030               |
| IL-2                 | 0.056 (-0.169 to 0.280)       | 0.628           | 0.723               |
| IL-3 <sup>b</sup>    | 0.126 (-0.166 to 0.417)       | 0.398           | 0.503               |
| IL-4                 | 0.507 (0.176 to 0.838)        | 0.003           | 0.013               |
| IL-5                 | -0.707 (-1.078 to -0.336)     | <0.001          | <0.001              |
| IL-6                 | 0.347 (0.027 to 0.668)        | 0.034           | 0.102               |
| IL-7                 | 1.136 (0.664 to 1.607)        | <0.001          | <0.001              |
| IL-8                 | -0.199 (-0.513 to 0.115)      | 0.214           | 0.293               |
| IL-9                 | 0.317 (-0.022 to 0.656)       | 0.067           | 0.142               |
| IL-10                | 0.528 (0.295 to 0.760)        | <0.001          | <0.001              |
| IL-12p40             | -0.187 (-0.510 to 0.137)      | 0.258           | 0.344               |
| IL-12p70             | 0.216 (-0.227 to 0.658)       | 0.339           | 0.440               |
| IL-13                | 0.369 (-0.096 to 0.833)       | 0.120           | 0.199               |
| IL-15                | 0.773 (0.258 to 1.287)        | 0.003           | 0.013               |
| IL-17A               | 0.040 (-0.256 to 0.335)       | 0.792           | 0.809               |
| IL-17E/IL-25         | 0.282 (-0.104 to 0.668)       | 0.152           | 0.219               |
| IL-17F               | 0.198 (-0.045 to 0.441)       | 0.110           | 0.197               |
| IL-18                | 0.821 (0.348 to 1.294)        | <0.001          | <0.001              |
| IL-22                | 0.296 (-0.109 to 0.701)       | 0.152           | 0.219               |
| IL-27                | 0.628 (0.022 to 1.232)        | 0.042           | 0.112               |
| IP-10/CXCL10         | 1.090 (0.709 to 1.463)        | <0.001          | <0.001              |
| MCP-1                | -0.136 (-1.055 to 0.782)      | 0.771           | 0.805               |
| MCP-3                | 0.619 (0.086 to 1.152)        | 0.022           | 0.070               |
| M-CSF                | 0.332 (-0.012 to 0.675)       | 0.058           | 0.133               |
| MDC                  | -1.561 (-2.415 to -0.707)     | <0.001          | <0.001              |
| MIG/CXCL9            | 0.644 (-0.017 to 1.304)       | 0.056           | 0.133               |
| MIP-1 $\alpha$ /CCL3 | -0.303 (-0.659 to 0.053)      | 0.096           | 0.184               |
| MIP-1 $\beta$ /CCL4  | -0.823 (-1.497 to -0.149)     | 0.017           | 0.058               |
| PDGF-AA              | 0.792 (-0.060 to 1.644)       | 0.068           | 0.142               |
| PDGF-AB/BB           | -1.563 (-3.715 to 0.589)      | 0.155           | 0.219               |
| RANTES               | 0.752 (-0.175 to 1.679)       | 0.112           | 0.197               |

|               |                        |       |       |
|---------------|------------------------|-------|-------|
| TGF- $\alpha$ | 0.687 (0.222 to 1.152) | 0.004 | 0.016 |
| TNF           | 0.997 (0.342 to 1.652) | 0.003 | 0.013 |
| LT- $\alpha$  | 0.874 (0.335 to 1.413) | 0.001 | 0.006 |
| VEGF-A        | 0.815 (0.327 to 1.303) | 0.001 | 0.006 |

**Legend:** <sup>a</sup> $\beta$  reflects mediator regression coefficient in a proportional odds model with World Health Organization COVID-19 severity (asymptomatic, mild, moderate, severe) as ordinal dependent variable and log<sub>10</sub> mediator concentration (continuous), age (continuous), sex (binary), HIV status (binary; 4 patients not known to be living with HIV but with missing rapid diagnostic tests analyzed as HIV negative), and SARS-CoV-2 variant phase (categorical) as independent variables; p-values reflect two-sided Wald test of mediator regression coefficient, adjusted using Benjamini-Hochberg method; <sup>b</sup>Large proportion of values below the lower limit of quantification (see Supplemental Table 15).

**Abbreviations:** BH: Benjamini-Hochberg, CI: confidence interval

**Supplemental Table 3: Association between COVID-19 severity and immune mediator concentrations in proportional odds models adjusted for age, sex, HIV co-infection, SARS-CoV-2 variant phase, and pre-enrollment illness duration (N=240; 66 individuals with asymptomatic SARS-CoV-2 infection excluded).**

| Mediator             | $\beta$ (95% CI) <sup>a</sup> | Nominal p-value | BH-adjusted p-value |
|----------------------|-------------------------------|-----------------|---------------------|
| sCD40L               | 0.199 (-0.261 to 0.659)       | 0.396           | 0.475               |
| EGF                  | 0.504 (-0.161 to 1.168)       | 0.137           | 0.235               |
| Eotaxin              | 0.412 (-0.501 to 1.325)       | 0.377           | 0.464               |
| FGF-2                | 0.310 (-0.285 to 0.906)       | 0.307           | 0.421               |
| FLT-3L               | 0.260 (-0.430 to 0.951)       | 0.460           | 0.539               |
| Fractalkine          | 1.159 (0.233 to 2.086)        | 0.014           | 0.045               |
| G-CSF <sup>b</sup>   | 0.340 (-0.013 to 0.694)       | 0.059           | 0.127               |
| GM-CSF <sup>b</sup>  | 0.182 (-0.157 to 0.520)       | 0.292           | 0.412               |
| GRO $\alpha$ /CXCL1  | -0.070 (-1.163 to 1.023)      | 0.900           | 0.900               |
| IFN- $\alpha$ 2      | 0.396 (-0.208 to 1.000)       | 0.199           | 0.303               |
| IFN- $\gamma$        | 0.183 (-0.098 to 0.465)       | 0.202           | 0.303               |
| IL-1 $\alpha$        | 0.125 (-0.340 to 0.647)       | 0.640           | 0.674               |
| IL-1 $\beta$         | 0.138 (-0.378 to 0.655)       | 0.600           | 0.670               |
| IL-1Ra               | 0.682 (0.185 to 1.180)        | 0.007           | 0.031               |
| IL-2                 | 0.047 (-0.256 to 0.350)       | 0.760           | 0.776               |
| IL-3 <sup>b</sup>    | 0.492 (0.083 to 0.901)        | 0.018           | 0.054               |
| IL-4                 | 1.022 (0.430 to 1.614)        | <0.001          | <0.001              |
| IL-5                 | -0.483 (-1.047 to 0.081)      | 0.093           | 0.186               |
| IL-6                 | 0.502 (0.082 to 0.922)        | 0.019           | 0.054               |
| IL-7                 | 1.526 (0.764 to 2.288)        | <0.001          | <0.001              |
| IL-8                 | -0.109 (-0.534 to 0.315)      | 0.614           | 0.670               |
| IL-9                 | 0.385 (-0.091 to 0.862)       | 0.113           | 0.209               |
| IL-10                | 0.713 (0.326 to 1.101)        | <0.001          | <0.001              |
| IL-12p40             | -0.442 (-0.880 to -0.005)     | 0.048           | 0.110               |
| IL-12p70             | 0.321 (-0.312 to 0.954)       | 0.320           | 0.427               |
| IL-13                | 0.733 (0.047 to 1.419)        | 0.036           | 0.086               |
| IL-15                | 1.287 (0.531 to 2.044)        | <0.001          | <0.001              |
| IL-17A               | 0.278 (-0.159 to 0.716)       | 0.212           | 0.308               |
| IL-17E/IL-25         | 0.431 (-0.109 to 0.971)       | 0.118           | 0.210               |
| IL-17F               | 0.334 (-0.016 to 0.684)       | 0.061           | 0.127               |
| IL-18                | 0.501 (-0.228 to 1.229)       | 0.178           | 0.285               |
| IL-22                | 0.832 (0.235 to 1.428)        | 0.006           | 0.029               |
| IL-27                | 0.384 (-0.416 to 1.184)       | 0.347           | 0.438               |
| IP-10/CXCL10         | 0.802 (0.359 to 1.244)        | <0.001          | <0.001              |
| MCP-1                | -0.332 (-1.499 to 0.834)      | 0.576           | 0.658               |
| MCP-3                | 0.787 (0.104 to 1.470)        | 0.024           | 0.064               |
| M-CSF                | 0.702 (0.152 to 1.252)        | 0.012           | 0.041               |
| MDC                  | -2.383 (-3.591 to -1.176)     | <0.001          | <0.001              |
| MIG/CXCL9            | 1.206 (0.319 to 2.093)        | 0.008           | 0.032               |
| MIP-1 $\alpha$ /CCL3 | -0.367 (-0.867 to 0.132)      | 0.150           | 0.248               |
| MIP-1 $\beta$ /CCL4  | -0.432 (-1.308 to 0.443)      | 0.333           | 0.432               |
| PDGF-AA              | 1.394 (0.168 to 2.620)        | 0.026           | 0.066               |

|               |                          |        |        |
|---------------|--------------------------|--------|--------|
| PDGF-AB/BB    | -2.689 (-5.955 to 0.578) | 0.107  | 0.205  |
| RANTES        | 0.302 (-0.987 to 1.592)  | 0.646  | 0.674  |
| TGF- $\alpha$ | 1.440 (0.737 to 2.144)   | <0.001 | <0.001 |
| TNF           | 1.155 (0.270 to 2.041)   | 0.011  | 0.041  |
| LT- $\alpha$  | 1.411 (0.618 to 2.204)   | <0.001 | <0.001 |
| VEGF-A        | 1.420 (0.528 to 2.311)   | 0.002  | 0.011  |

Legend: <sup>a</sup> $\beta$  reflects mediator regression coefficient in a proportional odds model with World Health Organization COVID-19 severity (mild, moderate, severe) as ordinal dependent variable and  $\log_{10}$  mediator concentration (continuous), age (continuous), sex (binary), HIV status (binary; 4 patients not known to be living with HIV but with missing rapid diagnostic tests analyzed as HIV negative), SARS-CoV-2 variant phase (categorical) and illness duration at enrollment (continuous) as independent variables; p-values reflect two-sided Wald test of mediator regression coefficient, adjusted using Benjamini-Hochberg method; <sup>b</sup>Large proportion of values below the lower limit of quantification (see Supplemental Table 15).

Abbreviations: BH: Benjamini-Hochberg, CI: confidence interval

**Supplemental Table 4: Immune mediator concentrations stratified by COVID-19 severity in persons living with HIV.**

| Mediator <sup>a</sup> | All PLWH<br>N=33     | Asymptomatic<br>N=9  | Mild<br>N=14         | Moderate<br>N=6      | Severe<br>N=4        | p-value <sup>b</sup> |
|-----------------------|----------------------|----------------------|----------------------|----------------------|----------------------|----------------------|
| sCD40L                | 3.61 [3.27, 3.76]    | 3.37 [3.15, 3.74]    | 3.57 [3.30, 3.66]    | 3.72 [3.23, 3.93]    | 3.85 [3.69, 4.02]    | 0.276                |
| EGF                   | 2.11 [1.60, 2.35]    | 1.87 [1.51, 2.19]    | 2.09 [1.83, 2.27]    | 2.31 [1.73, 2.52]    | 2.41 [2.29, 2.54]    | 0.194                |
| Eotaxin               | 1.45 [1.17, 1.69]    | 1.48 [1.39, 1.60]    | 1.45 [1.13, 1.69]    | 1.40 [1.06, 1.56]    | 1.61 [1.25, 2.05]    | 0.784                |
| FGF-2                 | 1.64 [1.17, 2.03]    | 1.24 [1.13, 1.73]    | 1.48 [1.20, 2.16]    | 2.07 [1.69, 2.38]    | 1.78 [1.54, 2.00]    | 0.336                |
| FLT-3L                | 1.32 [0.99, 1.59]    | 1.29 [0.74, 1.52]    | 1.20 [1.01, 1.60]    | 1.52 [1.30, 1.63]    | 1.45 [1.23, 1.67]    | 0.758                |
| Fractalkine           | 2.03 [1.91, 2.24]    | 1.97 [1.80, 2.06]    | 2.02 [1.90, 2.08]    | 2.12 [2.03, 2.22]    | 2.43 [2.29, 2.52]    | 0.176                |
| G-CSF <sup>c</sup>    | -0.18 [-0.18, 1.11]  | -0.18 [-0.18, -0.18] | -0.18 [-0.18, 1.12]  | -0.18 [-0.18, -0.18] | 1.72 [1.51, 1.99]    | 0.002                |
| GM-CSF <sup>c</sup>   | -1.00 [-1.00, -1.00] | -1.00 [-1.00, -1.00] | -1.00 [-1.00, -1.00] | -1.00 [-1.00, -1.00] | 0.48 [-0.29, 1.27]   | 0.001                |
| GRO-α/CXCL1           | 1.91 [1.68, 2.03]    | 1.78 [1.59, 1.86]    | 1.92 [1.73, 2.02]    | 1.90 [1.66, 1.98]    | 2.15 [2.04, 2.23]    | 0.097                |
| IFN-α2                | 1.74 [1.41, 1.88]    | 1.32 [1.11, 1.83]    | 1.73 [1.59, 1.83]    | 1.66 [1.36, 1.88]    | 1.85 [1.77, 1.98]    | 0.255                |
| IFN-γ                 | -0.57 [-1.40, 0.57]  | -1.40 [-1.40, -0.39] | -0.55 [-1.40, 0.02]  | -1.40 [-1.40, -0.31] | 0.97 [0.73, 1.09]    | 0.066                |
| IL-1α                 | 1.31 [1.03, 1.64]    | 1.15 [0.98, 1.47]    | 1.21 [1.03, 1.62]    | 1.56 [1.27, 1.76]    | 1.42 [1.29, 1.56]    | 0.348                |
| IL-1β                 | 1.15 [0.82, 1.57]    | 0.90 [0.49, 1.17]    | 1.28 [0.77, 1.71]    | 1.25 [1.05, 1.77]    | 1.20 [1.17, 1.31]    | 0.427                |
| IL-1Ra                | 0.67 [0.46, 0.98]    | 0.49 [0.03, 0.68]    | 0.64 [0.47, 0.80]    | 0.98 [0.53, 1.57]    | 1.45 [1.28, 1.70]    | 0.012                |
| IL-2                  | -0.51 [-1.40, 0.20]  | -0.89 [-1.70, -0.62] | -0.34 [-1.43, 0.33]  | -0.05 [-0.42, 0.22]  | -0.07 [-0.58, 0.17]  | 0.317                |
| IL-3 <sup>c</sup>     | -2.00 [-2.00, -2.00] | -2.00 [-2.00, -2.00] | -2.00 [-2.00, -2.00] | -2.00 [-2.00, -2.00] | -2.00 [-2.00, -2.00] | 0.212                |
| IL-4                  | 0.06 [-0.22, 0.35]   | -0.26 [-1.70, 0.03]  | 0.04 [-0.19, 0.40]   | 0.23 [0.07, 0.39]    | 0.37 [0.32, 0.45]    | 0.046                |
| IL-5                  | 1.06 [0.50, 1.21]    | 1.24 [1.20, 1.48]    | 1.06 [0.70, 1.17]    | 0.37 [0.23, 0.68]    | 0.46 [0.27, 0.77]    | 0.029                |
| IL-6                  | 0.43 [0.07, 1.10]    | 0.32 [-0.15, 0.54]   | 0.20 [0.03, 0.42]    | 1.01 [0.81, 1.35]    | 1.65 [1.50, 1.77]    | 0.001                |
| IL-7                  | 0.82 [0.54, 1.23]    | 0.59 [0.32, 0.82]    | 0.75 [0.45, 1.04]    | 1.01 [0.81, 1.16]    | 1.54 [1.44, 1.66]    | 0.022                |
| IL-8                  | 1.54 [1.10, 2.29]    | 1.33 [0.98, 2.53]    | 1.54 [0.94, 1.73]    | 2.80 [1.82, 3.14]    | 1.43 [1.37, 1.89]    | 0.200                |
| IL-9                  | 0.30 [-0.33, 0.75]   | -0.33 [-0.33, -0.33] | 0.44 [-0.24, 0.90]   | 0.35 [0.23, 0.76]    | 0.22 [-0.12, 0.55]   | 0.287                |
| IL-10                 | 0.39 [-0.15, 1.17]   | -0.15 [-0.37, 0.10]  | 0.43 [0.26, 0.91]    | 0.61 [-1.38, 1.30]   | 1.84 [1.64, 2.14]    | 0.005                |
| IL-12p40              | 1.52 [1.09, 1.66]    | 1.43 [1.17, 1.54]    | 1.59 [1.16, 1.74]    | 1.34 [0.90, 1.80]    | 1.15 [1.08, 1.36]    | 0.812                |
| IL-12p70              | 0.35 [0.20, 0.52]    | 0.22 [0.16, 0.38]    | 0.32 [0.23, 0.68]    | 0.43 [0.24, 0.55]    | 0.43 [0.38, 0.65]    | 0.195                |
| IL-13                 | 1.75 [1.47, 2.10]    | 1.75 [1.36, 2.10]    | 1.69 [1.54, 1.86]    | 1.67 [1.42, 1.79]    | 2.21 [2.16, 2.39]    | 0.146                |
| IL-15                 | 1.20 [1.04, 1.42]    | 1.13 [1.05, 1.18]    | 1.09 [1.00, 1.30]    | 1.29 [1.21, 1.40]    | 1.82 [1.60, 1.96]    | 0.023                |
| IL-17A                | 0.76 [0.30, 1.14]    | 0.30 [0.14, 1.04]    | 0.74 [0.29, 1.12]    | 0.91 [0.64, 1.58]    | 0.78 [0.40, 1.15]    | 0.547                |
| IL-17E/IL-25          | 2.30 [2.07, 2.78]    | 2.09 [1.84, 2.26]    | 2.32 [2.17, 2.43]    | 2.85 [1.46, 2.98]    | 2.81 [2.64, 2.86]    | 0.267                |
| IL-17F                | -0.25 [-0.25, 1.27]  | -0.25 [-0.25, -0.25] | -0.25 [-0.25, 1.15]  | 0.46 [-0.25, 1.28]   | 1.10 [0.52, 1.44]    | 0.514                |
| IL-18                 | 1.69 [1.37, 1.87]    | 1.44 [1.37, 1.91]    | 1.68 [1.17, 1.86]    | 1.77 [1.59, 1.81]    | 1.74 [1.53, 1.97]    | 0.751                |
| IL-22                 | 1.69 [0.84, 2.07]    | 1.15 [0.84, 1.84]    | 1.65 [0.97, 1.75]    | 1.71 [1.37, 1.74]    | 2.17 [2.14, 2.27]    | 0.052                |
| IL-27                 | 3.08 [2.71, 3.23]    | 3.08 [2.71, 3.22]    | 3.09 [2.67, 3.28]    | 3.03 [2.67, 3.12]    | 3.79 [3.47, 3.88]    | 0.220                |
| IP-10/CXCL10          | 2.47 [2.01, 2.59]    | 2.47 [2.04, 2.52]    | 2.45 [1.86, 2.61]    | 2.12 [2.02, 2.39]    | 4.20 [3.72, 4.43]    | 0.013                |
| MCP-1                 | 2.44 [2.28, 2.54]    | 2.42 [2.27, 2.45]    | 2.44 [2.34, 2.45]    | 2.33 [2.08, 2.59]    | 2.69 [2.54, 2.89]    | 0.084                |
| MCP-3                 | 1.09 [0.96, 1.70]    | 1.02 [0.93, 1.36]    | 1.06 [0.96, 1.16]    | 1.81 [1.10, 2.60]    | 1.70 [1.67, 1.80]    | 0.099                |
| M-CSF                 | 2.07 [1.86, 2.32]    | 2.09 [1.98, 2.16]    | 1.89 [1.77, 2.07]    | 2.04 [1.94, 2.36]    | 2.67 [2.53, 2.74]    | 0.044                |
| MDC                   | 2.97 [2.77, 3.17]    | 2.95 [2.71, 3.04]    | 3.14 [2.89, 3.25]    | 2.98 [2.94, 3.13]    | 2.77 [2.66, 2.88]    | 0.146                |
| MIG/CXCL9             | 3.53 [3.25, 3.73]    | 3.43 [3.13, 3.63]    | 3.51 [3.35, 3.73]    | 3.65 [3.26, 3.68]    | 4.31 [3.89, 4.55]    | 0.167                |
| MIP-1α/CCL3           | 1.49 [1.37, 1.68]    | 1.26 [1.20, 1.46]    | 1.45 [1.37, 1.59]    | 1.68 [1.66, 1.82]    | 1.50 [1.47, 1.92]    | 0.042                |
| MIP-1β/CCL4           | 1.73 [1.62, 1.96]    | 1.78 [1.59, 1.96]    | 1.72 [1.66, 1.80]    | 2.12 [1.75, 2.42]    | 1.62 [1.59, 1.92]    | 0.441                |
| PDGF-AA               | 3.42 [3.31, 3.54]    | 3.32 [3.27, 3.48]    | 3.45 [3.34, 3.54]    | 3.49 [3.42, 3.62]    | 3.59 [3.26, 3.88]    | 0.373                |
| PDGF-AB/BB            | 4.43 [4.37, 4.49]    | 4.47 [4.34, 4.49]    | 4.44 [4.41, 4.48]    | 4.43 [4.43, 4.54]    | 4.33 [4.31, 4.38]    | 0.372                |
| RANTES/CCL5           | 3.36 [3.28, 3.44]    | 3.34 [3.28, 3.42]    | 3.35 [3.29, 3.38]    | 3.40 [3.16, 3.62]    | 3.51 [3.43, 3.62]    | 0.183                |
| TGF-α                 | 0.82 [0.48, 1.10]    | 0.43 [0.36, 0.99]    | 0.77 [0.50, 0.95]    | 0.91 [0.88, 0.96]    | 1.47 [1.15, 1.73]    | 0.096                |
| TNF                   | 1.75 [1.58, 1.96]    | 1.70 [1.60, 1.81]    | 1.68 [1.45, 1.90]    | 1.79 [1.61, 2.02]    | 2.21 [2.11, 2.37]    | 0.040                |
| Lymphotoxin-α         | 1.18 [0.98, 1.69]    | 1.09 [0.72, 1.28]    | 1.16 [1.01, 1.32]    | 1.23 [0.96, 1.67]    | 1.73 [1.70, 1.88]    | 0.055                |
| VEGF-A                | 2.54 [2.16, 2.79]    | 1.94 [1.65, 2.38]    | 2.64 [2.38, 2.81]    | 2.56 [2.21, 2.86]    | 2.87 [2.69, 3.06]    | 0.038                |

**Legend:** <sup>a</sup>Mediator concentrations presented as log<sub>10</sub> pg/ml with median and interquartile range; <sup>b</sup>Reflects results of Kruskal-Wallis H test; <sup>c</sup>Large proportion of values below the lower limit of quantification (see Supplemental Table 15).

**Abbreviation:** PLWH: persons living with HIV



**Supplemental Table 5: Abundance of immune cell populations as inferred from CIBERTSORTx digital cytometry deconvolution, stratified by COVID-19 severity.**

| Immune cell population <sup>a</sup>       | All patients<br>N=100 | Non-severe<br>N=84   | Severe<br>N=16       | p-value <sup>b</sup> |
|-------------------------------------------|-----------------------|----------------------|----------------------|----------------------|
| Naïve B cells                             | 3.88 [2.57, 5.50]     | 3.82 [2.26, 5.26]    | 4.58 [3.26, 5.99]    | 0.229                |
| Memory B cells                            | 0.00 [0.00, 0.20]     | 0.00 [0.00, 0.20]    | 0.00 [0.00, 0.23]    | 0.923                |
| Plasma cells                              | 0.49 [0.26, 0.96]     | 0.44 [0.26, 0.75]    | 1.41 [0.72, 1.86]    | 0.001                |
| CD8 <sup>+</sup> T cells                  | 2.05 [0.00, 4.02]     | 2.15 [0.21, 4.38]    | 0.00 [0.00, 2.79]    | 0.028                |
| Naïve CD4 <sup>+</sup> T cells            | 8.98 [5.84, 12.52]    | 8.98 [5.84, 12.82]   | 8.81 [6.94, 11.69]   | 0.645                |
| Resting memory CD4 <sup>+</sup> T cells   | 14.81 [11.82, 17.12]  | 14.92 [12.33, 17.16] | 13.31 [5.52, 16.16]  | 0.094                |
| Activated memory CD4 <sup>+</sup> T cells | 0.00 [0.00, 0.70]     | 0.00 [0.00, 0.66]    | 0.37 [0.00, 2.32]    | 0.104                |
| Resting NK-cells                          | 11.78 [9.73, 14.64]   | 12.04 [9.87, 14.79]  | 9.81 [8.29, 12.57]   | 0.055                |
| Monocytes                                 | 8.80 [6.36, 11.12]    | 8.47 [6.32, 10.21]   | 11.35 [8.28, 13.99]  | 0.043                |
| Activated dendritic cells                 | 0.00 [0.00, 0.07]     | 0.00 [0.00, 0.07]    | 0.00 [0.00, 0.07]    | 0.604                |
| Resting mast cells                        | 0.40 [0.11, 0.72]     | 0.36 [0.16, 0.65]    | 0.64 [0.00, 1.30]    | 0.305                |
| Neutrophils                               | 10.83 [7.71, 18.77]   | 10.03 [6.96, 14.80]  | 50.67 [16.23, 66.67] | <0.001               |

**Legend:** <sup>a</sup>Eosinophils omitted from table given very low inferred absolute abundance across groups. <sup>b</sup>Reflects result of unadjusted two-sided Wilcoxon rank-sum test.

**Supplemental Table 6: Association between COVID-19 severity and immune mediator concentrations among patients enrolled ≤7 days from symptom onset.**

| Mediator <sup>a</sup> | All patients<br>N=85 | Mild-moderate<br>COVID-19<br>N=71 | Severe COVID-19<br>N=14 | Nominal<br>p-value <sup>b</sup> | BH-adjusted<br>p-value <sup>b</sup> |
|-----------------------|----------------------|-----------------------------------|-------------------------|---------------------------------|-------------------------------------|
| sCD40L                | 3.72 [3.39, 3.95]    | 3.71 [3.35, 3.93]                 | 3.79 [3.40, 3.99]       | 0.355                           | 0.604                               |
| EGF                   | 2.10 [1.85, 2.42]    | 2.06 [1.83, 2.40]                 | 2.35 [2.22, 2.64]       | 0.005                           | 0.034                               |
| Eotaxin               | 1.49 [1.28, 1.66]    | 1.50 [1.30, 1.65]                 | 1.36 [1.19, 1.69]       | 0.448                           | 0.652                               |
| FGF-2                 | 1.78 [1.50, 2.04]    | 1.72 [1.47, 2.03]                 | 1.91 [1.74, 2.07]       | 0.248                           | 0.496                               |
| FLT-3L                | 1.35 [1.11, 1.64]    | 1.35 [1.11, 1.65]                 | 1.36 [1.18, 1.47]       | 0.887                           | 0.959                               |
| Fractalkine           | 2.09 [1.92, 2.34]    | 2.04 [1.90, 2.31]                 | 2.18 [2.04, 2.51]       | 0.155                           | 0.384                               |
| G-CSF <sup>c</sup>    | -0.18 [-0.18, 1.49]  | -0.18 [-0.18, 1.46]               | -0.18 [-0.18, 1.50]     | 0.939                           | 0.959                               |
| GM-CSF <sup>c</sup>   | -1.00 [-1.00, -1.00] | -1.00 [-1.00, -1.00]              | -1.00 [-1.00, -1.00]    | 0.591                           | 0.727                               |
| GRO $\alpha$ /CXCL1   | 2.01 [1.77, 2.19]    | 2.00 [1.75, 2.13]                 | 2.12 [1.94, 2.26]       | 0.160                           | 0.384                               |
| IFN- $\alpha$ 2       | 1.80 [1.61, 2.06]    | 1.78 [1.57, 2.05]                 | 1.86 [1.72, 2.18]       | 0.171                           | 0.391                               |
| IFN- $\gamma$         | -0.08 [-1.40, 0.83]  | -0.14 [-1.40, 0.84]               | 0.20 [-1.40, 0.65]      | 1.000                           | 1.000                               |
| IL-1 $\alpha$         | 1.41 [1.10, 1.77]    | 1.34 [1.08, 1.77]                 | 1.49 [1.28, 1.71]       | 0.216                           | 0.451                               |
| IL-1 $\beta$          | 1.45 [1.04, 1.75]    | 1.41 [1.03, 1.69]                 | 1.76 [1.41, 1.85]       | 0.044                           | 0.162                               |
| IL-1Ra                | 0.85 [0.57, 1.29]    | 0.78 [0.50, 1.14]                 | 1.31 [1.13, 1.49]       | 0.002                           | 0.016                               |
| IL-2                  | 0.06 [-0.57, 0.51]   | 0.06 [-0.57, 0.51]                | 0.02 [-1.37, 0.50]      | 0.758                           | 0.910                               |
| IL-3 <sup>c</sup>     | -2.00 [-2.00, -2.00] | -2.00 [-2.00, -2.00]              | -2.00 [-2.00, -2.00]    | 0.578                           | 0.728                               |
| IL-4                  | 0.11 [-0.30, 0.37]   | 0.08 [-0.39, 0.36]                | 0.22 [0.11, 0.47]       | 0.104                           | 0.293                               |
| IL-5                  | 0.74 [0.29, 1.03]    | 0.81 [0.43, 1.03]                 | 0.35 [0.07, 0.91]       | 0.062                           | 0.213                               |
| IL-6                  | 0.46 [0.08, 0.80]    | 0.38 [0.03, 0.71]                 | 0.64 [0.53, 1.69]       | 0.017                           | 0.082                               |
| IL-7                  | 0.78 [0.58, 1.07]    | 0.75 [0.45, 0.95]                 | 1.09 [0.88, 1.46]       | 0.001                           | 0.016                               |
| IL-8                  | 1.67 [1.21, 2.19]    | 1.70 [1.19, 2.11]                 | 1.58 [1.41, 2.39]       | 0.441                           | 0.652                               |
| IL-9                  | 0.32 [-0.33, 0.79]   | 0.42 [-0.33, 0.79]                | 0.13 [-0.33, 0.93]      | 0.937                           | 0.959                               |
| IL-10                 | 0.62 [0.20, 1.19]    | 0.58 [0.23, 1.06]                 | 0.98 [0.27, 1.50]       | 0.286                           | 0.528                               |
| IL-12p40              | 1.68 [1.36, 1.95]    | 1.72 [1.48, 2.04]                 | 1.31 [0.08, 1.65]       | 0.010                           | 0.060                               |
| IL-12p70              | 0.44 [0.35, 0.63]    | 0.44 [0.34, 0.61]                 | 0.41 [0.35, 0.85]       | 0.896                           | 0.959                               |
| IL-13                 | 1.73 [1.56, 2.09]    | 1.73 [1.55, 2.05]                 | 1.74 [1.60, 2.15]       | 0.845                           | 0.959                               |
| IL-15                 | 1.26 [1.03, 1.57]    | 1.23 [1.02, 1.45]                 | 1.69 [1.41, 1.87]       | 0.001                           | 0.016                               |
| IL-17A                | 0.92 [0.56, 1.34]    | 0.84 [0.52, 1.24]                 | 1.15 [0.72, 1.54]       | 0.110                           | 0.293                               |
| IL-17E/IL-25          | 2.51 [2.20, 2.74]    | 2.49 [2.17, 2.74]                 | 2.59 [2.33, 2.78]       | 0.434                           | 0.652                               |
| IL-17F                | 0.48 [-0.25, 1.21]   | 0.34 [-0.25, 1.19]                | 1.14 [0.85, 1.41]       | 0.030                           | 0.131                               |
| IL-18                 | 1.71 [1.47, 1.93]    | 1.71 [1.44, 1.92]                 | 1.70 [1.51, 1.98]       | 0.822                           | 0.959                               |
| IL-22                 | 1.69 [0.84, 1.93]    | 1.63 [0.84, 1.88]                 | 1.74 [0.93, 2.05]       | 0.587                           | 0.727                               |
| IL-27                 | 3.21 [2.91, 3.41]    | 3.22 [2.92, 3.40]                 | 3.19 [2.91, 3.47]       | 0.929                           | 0.959                               |
| IP-10/CXCL10          | 2.42 [2.05, 2.80]    | 2.35 [2.02, 2.66]                 | 3.10 [2.50, 3.63]       | 0.002                           | 0.016                               |
| MCP-1                 | 2.35 [2.14, 2.49]    | 2.36 [2.17, 2.49]                 | 2.27 [2.01, 2.48]       | 0.477                           | 0.673                               |
| MCP-3                 | 1.17 [1.06, 1.44]    | 1.16 [1.04, 1.36]                 | 1.35 [1.15, 1.58]       | 0.110                           | 0.293                               |
| M-CSF                 | 2.11 [1.86, 2.39]    | 2.10 [1.78, 2.39]                 | 2.19 [2.00, 2.34]       | 0.365                           | 0.604                               |
| MDC                   | 3.08 [2.88, 3.22]    | 3.13 [2.93, 3.23]                 | 2.88 [2.58, 3.06]       | 0.002                           | 0.016                               |
| MIG/CXCL9             | 3.45 [3.26, 3.66]    | 3.44 [3.25, 3.60]                 | 3.49 [3.35, 3.83]       | 0.201                           | 0.439                               |
| MIP-1 $\alpha$ /CCL3  | 1.56 [1.39, 1.95]    | 1.56 [1.39, 1.87]                 | 1.64 [1.39, 2.39]       | 0.562                           | 0.727                               |
| MIP-1 $\beta$ /CCL4   | 1.83 [1.64, 2.00]    | 1.80 [1.65, 1.99]                 | 1.95 [1.68, 2.03]       | 0.303                           | 0.539                               |
| PDGF-AA               | 3.51 [3.38, 3.68]    | 3.50 [3.38, 3.69]                 | 3.57 [3.42, 3.65]       | 0.530                           | 0.727                               |
| PDGF-AB/BB            | 4.46 [4.41, 4.52]    | 4.47 [4.42, 4.52]                 | 4.42 [4.40, 4.46]       | 0.037                           | 0.148                               |
| RANTES                | 3.36 [3.25, 3.46]    | 3.36 [3.25, 3.46]                 | 3.34 [3.18, 3.44]       | 0.427                           | 0.652                               |
| TGF- $\alpha$         | 0.93 [0.59, 1.31]    | 0.88 [0.56, 1.20]                 | 1.49 [1.12, 1.64]       | <0.001                          | 0.016                               |
| TNF                   | 1.79 [1.60, 2.00]    | 1.78 [1.59, 1.94]                 | 1.84 [1.73, 2.11]       | 0.260                           | 0.499                               |
| LT- $\alpha$          | 1.24 [1.02, 1.51]    | 1.20 [0.97, 1.46]                 | 1.43 [1.25, 1.64]       | 0.067                           | 0.214                               |
| VEGF-A                | 2.52 [2.18, 2.75]    | 2.42 [2.15, 2.73]                 | 2.65 [2.55, 2.88]       | 0.013                           | 0.069                               |

Legend: <sup>a</sup>Mediator concentrations presented as log<sub>10</sub> pg/ml with median and interquartile range; <sup>b</sup>Reflects results of two-sided Wilcoxon rank-sum test, unadjusted (nominal) and adjusted using Benjamini-Hochberg method; <sup>c</sup>Large proportion of values below the lower limit of quantification (see Supplemental Table 15).

Abbreviations: BH: Benjamini-Hochberg

**Supplemental Table 7: Immune mediator concentrations stratified by SARS-CoV-2 variant-driven pandemic phase at time of hospitalization.**

| Mediator <sup>a</sup> | All patients<br>N=306 | Varied A/B<br>Lineages<br>N=97 | A.23/A.23.1<br>N=141 | Delta<br>(B.1.617.2/AY)<br>N=68 | p-value <sup>b</sup> |
|-----------------------|-----------------------|--------------------------------|----------------------|---------------------------------|----------------------|
| sCD40L                | 3.77 [3.38, 3.99]     | 3.65 [3.40, 3.84]              | 3.70 [2.33, 3.96]    | 4.00 [3.86, 4.10]               | <0.001               |
| EGF                   | 2.28 [1.95, 2.57]     | 2.10 [1.83, 2.35]              | 2.36 [2.01, 2.66]    | 2.45 [2.13, 2.61]               | <0.001               |
| Eotaxin               | 1.47 [1.24, 1.62]     | 1.51 [1.37, 1.62]              | 1.48 [1.21, 1.62]    | 1.43 [1.16, 1.60]               | 0.092                |
| FGF-2                 | 1.81 [1.51, 2.11]     | 1.71 [1.42, 2.10]              | 1.82 [1.57, 2.09]    | 1.89 [1.67, 2.17]               | 0.030                |
| FLT-3L                | 1.38 [1.11, 1.62]     | 1.27 [1.08, 1.52]              | 1.48 [1.17, 1.72]    | 1.34 [1.10, 1.60]               | 0.005                |
| Fractalkine           | 2.09 [1.95, 2.29]     | 2.04 [1.91, 2.29]              | 2.08 [1.96, 2.27]    | 2.18 [2.05, 2.47]               | 0.010                |
| G-CSF <sup>c</sup>    | -0.18 [-0.18, 1.30]   | -0.18 [-0.18, 1.16]            | -0.18 [-0.18, 1.26]  | 1.03 [-0.18, 1.53]              | 0.003                |
| GM-CSF <sup>c</sup>   | -1.00 [-1.00, -1.00]  | -1.00 [-1.00, -1.00]           | -1.00 [-1.00, -1.00] | -1.00 [-1.00, -1.00]            | 0.643                |
| GRO $\alpha$ /CXCL1   | 2.01 [1.83, 2.17]     | 1.97 [1.78, 2.11]              | 2.02 [1.83, 2.19]    | 2.03 [1.92, 2.18]               | 0.119                |
| IFN- $\alpha$ 2       | 1.82 [1.61, 2.04]     | 1.75 [1.46, 2.04]              | 1.84 [1.65, 1.98]    | 1.82 [1.66, 2.07]               | 0.180                |
| IFN- $\gamma$         | -0.08 [-1.40, 0.69]   | -0.39 [-1.40, 0.59]            | -0.09 [-1.40, 0.66]  | 0.16 [-1.40, 0.91]              | 0.130                |
| IL-1 $\alpha$         | 1.41 [1.15, 1.77]     | 1.41 [1.08, 1.77]              | 1.40 [1.18, 1.75]    | 1.44 [1.22, 1.82]               | 0.412                |
| IL-1 $\beta$          | 1.44 [1.09, 1.78]     | 1.35 [0.89, 1.75]              | 1.47 [1.14, 1.74]    | 1.49 [1.14, 2.04]               | 0.064                |
| IL-1Ra                | 0.86 [0.54, 1.31]     | 0.67 [0.41, 1.10]              | 0.82 [0.54, 1.25]    | 1.31 [0.99, 1.68]               | <0.001               |
| IL-2                  | 0.01 [-0.62, 0.53]    | -0.10 [-0.92, 0.51]            | 0.00 [-0.57, 0.52]   | 0.20 [-0.40, 0.63]              | 0.183                |
| IL-3 <sup>c</sup>     | -2.00 [-2.00, -2.00]  | -2.00 [-2.00, -2.00]           | -2.00 [-2.00, -1.30] | -2.00 [-2.00, -2.00]            | 0.027                |
| IL-4                  | 0.20 [-0.11, 0.46]    | 0.08 [-0.36, 0.35]             | 0.25 [-0.06, 0.47]   | 0.30 [0.05, 0.60]               | 0.001                |
| IL-5                  | 0.71 [0.28, 1.12]     | 0.68 [0.25, 1.18]              | 0.69 [0.30, 1.06]    | 0.90 [0.21, 1.23]               | 0.775                |
| IL-6                  | 0.49 [0.10, 1.13]     | 0.26 [-0.10, 0.55]             | 0.57 [0.12, 1.16]    | 1.00 [0.45, 1.68]               | <0.001               |
| IL-7                  | 0.84 [0.51, 1.08]     | 0.68 [0.41, 0.93]              | 0.88 [0.53, 1.10]    | 1.01 [0.78, 1.32]               | <0.001               |
| IL-8                  | 1.78 [1.26, 2.37]     | 1.53 [1.02, 2.08]              | 1.70 [1.27, 2.47]    | 2.13 [1.73, 2.76]               | <0.001               |
| IL-9                  | 0.59 [-0.33, 0.94]    | -0.33 [-0.33, 0.71]            | 0.66 [-0.33, 0.96]   | 0.74 [-0.06, 1.01]              | 0.001                |
| IL-10                 | 0.60 [0.02, 1.16]     | 0.34 [-0.34, 0.77]             | 0.50 [-0.14, 0.89]   | 1.35 [0.77, 1.58]               | <0.001               |
| IL-12p40              | 1.64 [1.27, 1.91]     | 1.62 [1.20, 1.92]              | 1.66 [1.32, 1.89]    | 1.62 [1.20, 1.92]               | 0.768                |
| IL-12p70              | 0.42 [0.29, 0.62]     | 0.40 [0.22, 0.62]              | 0.42 [0.32, 0.62]    | 0.47 [0.26, 0.66]               | 0.581                |
| IL-13                 | 1.86 [1.65, 2.18]     | 1.75 [1.54, 2.00]              | 1.91 [1.72, 2.15]    | 2.01 [1.73, 2.33]               | 0.003                |
| IL-15                 | 1.34 [1.11, 1.63]     | 1.14 [0.94, 1.35]              | 1.36 [1.19, 1.56]    | 1.64 [1.35, 1.87]               | <0.001               |
| IL-17A                | 0.97 [0.57, 1.41]     | 0.91 [0.40, 1.39]              | 0.97 [0.57, 1.36]    | 1.03 [0.63, 1.47]               | 0.216                |
| IL-17E/IL-25          | 2.55 [2.27, 2.77]     | 2.41 [2.12, 2.66]              | 2.62 [2.41, 2.82]    | 2.58 [2.29, 2.77]               | 0.006                |
| IL-17F                | 0.83 [-0.25, 1.49]    | 0.23 [-0.25, 1.25]             | 0.93 [-0.25, 1.54]   | 1.09 [-0.01, 1.58]              | 0.005                |
| IL-18                 | 1.68 [1.41, 1.93]     | 1.58 [1.28, 1.85]              | 1.69 [1.39, 1.90]    | 1.83 [1.61, 2.12]               | <0.001               |
| IL-22                 | 1.81 [1.35, 2.06]     | 1.62 [0.84, 1.89]              | 1.88 [1.49, 2.06]    | 1.93 [1.64, 2.21]               | <0.001               |
| IL-27                 | 3.15 [2.89, 3.37]     | 3.07 [2.84, 3.29]              | 3.13 [2.83, 3.35]    | 3.34 [3.13, 3.55]               | <0.001               |
| IP-10/CXCL10          | 2.25 [1.96, 2.60]     | 2.21 [1.99, 2.53]              | 2.28 [1.96, 2.56]    | 2.42 [1.92, 3.32]               | 0.082                |
| MCP-1                 | 2.35 [2.19, 2.48]     | 2.31 [2.21, 2.44]              | 2.37 [2.19, 2.51]    | 2.31 [2.13, 2.47]               | 0.218                |
| MCP-3                 | 1.24 [1.08, 1.55]     | 1.12 [1.02, 1.36]              | 1.26 [1.13, 1.60]    | 1.35 [1.17, 1.63]               | <0.001               |
| M-CSF                 | 2.14 [1.87, 2.42]     | 1.96 [1.73, 2.27]              | 2.21 [2.01, 2.53]    | 2.22 [1.88, 2.50]               | <0.001               |
| MDC                   | 3.03 [2.85, 3.20]     | 3.07 [2.94, 3.18]              | 3.04 [2.83, 3.21]    | 2.92 [2.73, 3.16]               | 0.008                |
| MIG/CXCL9             | 3.47 [3.24, 3.67]     | 3.40 [3.22, 3.59]              | 3.49 [3.26, 3.69]    | 3.55 [3.24, 3.82]               | 0.038                |
| MIP-1 $\alpha$ /CCL3  | 1.67 [1.45, 2.22]     | 1.49 [1.34, 1.87]              | 1.66 [1.48, 2.09]    | 1.87 [1.61, 2.83]               | <0.001               |
| MIP-1 $\beta$ /CCL4   | 1.83 [1.64, 2.07]     | 1.76 [1.64, 1.97]              | 1.82 [1.59, 2.03]    | 2.06 [1.83, 2.35]               | <0.001               |
| PDGF-AA               | 3.53 [3.39, 3.69]     | 3.47 [3.36, 3.60]              | 3.58 [3.43, 3.73]    | 3.54 [3.42, 3.68]               | 0.005                |
| PDGF-AB/BB            | 4.47 [4.42, 4.52]     | 4.47 [4.41, 4.51]              | 4.49 [4.44, 4.54]    | 4.45 [4.41, 4.52]               | 0.025                |
| RANTES                | 3.37 [3.23, 3.48]     | 3.34 [3.22, 3.44]              | 3.41 [3.28, 3.54]    | 3.33 [3.19, 3.46]               | 0.011                |
| TGF- $\alpha$         | 1.07 [0.76, 1.47]     | 0.76 [0.49, 1.07]              | 1.10 [0.86, 1.35]    | 1.53 [1.16, 1.78]               | <0.001               |
| TNF                   | 1.81 [1.64, 2.03]     | 1.74 [1.63, 1.88]              | 1.78 [1.62, 1.98]    | 2.02 [1.78, 2.26]               | <0.001               |
| LT- $\alpha$          | 1.37 [1.14, 1.65]     | 1.18 [0.99, 1.43]              | 1.40 [1.20, 1.66]    | 1.53 [1.28, 1.76]               | <0.001               |
| VEGF-A                | 2.57 [2.31, 2.82]     | 2.48 [2.16, 2.71]              | 2.58 [2.36, 2.86]    | 2.70 [2.47, 2.96]               | <0.001               |

**Legend:** <sup>a</sup>Mediator concentrations presented as log<sub>10</sub> pg/ml with median and interquartile range; <sup>b</sup>Reflects results of Kruskal-Wallis H test; <sup>c</sup>Large proportion of values below the lower limit of quantification (see Supplemental Table 15).

**Supplemental Table 8: Association between immune mediators and Delta phase COVID-19 (N=306).**

| Mediator             | Delta phase $\beta$<br>(95% CI) <sup>a</sup> | Nominal p-value | BH-adjusted p-value |
|----------------------|----------------------------------------------|-----------------|---------------------|
| sCD40L               | 0.552 (0.369 to 0.735)                       | <0.001          | 0.004364            |
| EGF                  | 0.143 (0.001 to 0.285)                       | 0.049           | 0.1272              |
| Eotaxin              | -0.020 (-0.107 to 0.067)                     | 0.655           | 0.731163            |
| FGF-2                | 0.086 (-0.059 to 0.231)                      | 0.242           | 0.37471             |
| FLT-3L               | -0.120 (-0.242 to 0.001)                     | 0.052           | 0.1272              |
| Fractalkine          | 0.107 (0.020 to 0.193)                       | 0.016           | 0.048               |
| G-CSF <sup>b</sup>   | 0.348 (0.111 to 0.585)                       | 0.004           | 0.016               |
| GM-CSF <sup>b</sup>  | 0.030 (-0.206 to 0.267)                      | 0.801           | 0.873818            |
| GRO $\alpha$ /CXCL1  | 0.061 (-0.016 to 0.138)                      | 0.122           | 0.254609            |
| IFN- $\alpha$ 2      | -0.002 (-0.137 to 0.134)                     | 0.981           | 0.981               |
| IFN- $\gamma$        | 0.156 (-0.141 to 0.452)                      | 0.302           | 0.419657            |
| IL-1 $\alpha$        | 0.074 (-0.084 to 0.231)                      | 0.358           | 0.464432            |
| IL-1 $\beta$         | 0.091 (-0.069 to 0.250)                      | 0.266           | 0.399               |
| IL-1Ra               | 0.397 (0.235 to 0.558)                       | <0.001          | 0.004364            |
| IL-2                 | 0.114 (-0.151 to 0.378)                      | 0.398           | 0.489846            |
| IL-3 <sup>b</sup>    | -0.055 (-0.264 to 0.155)                     | 0.607           | 0.693714            |
| IL-4                 | 0.114 (-0.066 to 0.294)                      | 0.213           | 0.3408              |
| IL-5                 | 0.115 (-0.052 to 0.283)                      | 0.176           | 0.309517            |
| IL-6                 | 0.471 (0.283 to 0.659)                       | <0.001          | 0.004364            |
| IL-7                 | 0.106 (-0.024 to 0.237)                      | 0.110           | 0.24                |
| IL-8                 | 0.487 (0.284 to 0.689)                       | <0.001          | 0.004364            |
| IL-9                 | 0.134 (-0.045 to 0.313)                      | 0.141           | 0.282               |
| IL-10                | 0.903 (0.641 to 1.166)                       | <0.001          | 0.004364            |
| IL-12p40             | 0.004 (-0.191 to 0.199)                      | 0.968           | 0.981               |
| IL-12p70             | -0.066 (-0.200 to 0.067)                     | 0.329           | 0.438667            |
| IL-13                | 0.093 (-0.035 to 0.221)                      | 0.154           | 0.289846            |
| IL-15                | 0.226 (0.108 to 0.344)                       | <0.001          | 0.004364            |
| IL-17A               | 0.110 (-0.088 to 0.309)                      | 0.275           | 0.4                 |
| IL-17E/IL-25         | -0.107 (-0.265 to 0.052)                     | 0.187           | 0.309517            |
| IL-17F               | 0.089 (-0.164 to 0.342)                      | 0.490           | 0.588               |
| IL-18                | 0.193 (0.060 to 0.326)                       | 0.005           | 0.018462            |
| IL-22                | 0.143 (-0.004 to 0.290)                      | 0.056           | 0.128               |
| IL-27                | 0.243 (0.143 to 0.342)                       | <0.001          | 0.004364            |
| IP-10/CXCL10         | 0.230 (0.051 to 0.409)                       | 0.012           | 0.0384              |
| MCP-1                | -0.044 (-0.108 to 0.021)                     | 0.185           | 0.309517            |
| MCP-3                | 0.060 (-0.055 to 0.174)                      | 0.306           | 0.419657            |
| M-CSF                | 0.010 (-0.168 to 0.189)                      | 0.908           | 0.947478            |
| MDC                  | -0.087 (-0.159 to -0.015)                    | 0.018           | 0.050824            |
| MIG/CXCL9            | 0.029 (-0.062 to 0.119)                      | 0.534           | 0.625171            |
| MIP-1 $\alpha$ /CCL3 | 0.372 (0.200 to 0.544)                       | <0.001          | 0.004364            |
| MIP-1 $\beta$ /CCL4  | 0.281 (0.190 to 0.373)                       | <0.001          | 0.004364            |
| PDGF-AA              | -0.006 (-0.079 to 0.066)                     | 0.861           | 0.9184              |
| PDGF-AB/BB           | -0.013 (-0.041 to 0.016)                     | 0.380           | 0.48                |

|               |                          |        |          |
|---------------|--------------------------|--------|----------|
| RANTES        | -0.049 (-0.116 to 0.019) | 0.157  | 0.289846 |
| TGF- $\alpha$ | 0.383 (0.248 to 0.519)   | <0.001 | 0.004364 |
| TNF           | 0.172 (0.081 to 0.264)   | <0.001 | 0.004364 |
| LT- $\alpha$  | 0.145 (0.036 to 0.254)   | 0.009  | 0.030857 |
| VEGF-A        | 0.122 (-0.002 to 0.245)  | 0.053  | 0.1272   |

Legend: <sup>a</sup> $\beta$  reflects regression coefficient for Delta phase (hospitalization during Delta phase=1, hospitalization during either two prior phases=0) in a linear regression model with each log<sub>10</sub> mediator concentration as dependent variable and age (continuous), sex (binary), HIV status (binary; 4 patients not known to be living with HIV but with missing rapid diagnostic tests analyzed as HIV negative), exposure to corticosteroids (binary), and WHO clinical severity (categorical) as independent co-variables; p-values reflect two-sided Wald test of mediator regression coefficient, adjusted using Benjamini-Hochberg method; <sup>b</sup>Large proportion of values below the lower limit of quantification (see Supplemental Table 15).

Abbreviations: BH: Benjamini-Hochberg, CI: Confidence interval

**Supplemental Table 9: Association between inferred immune cell abundance and Delta phase COVID-19 (N=100).**

| <b>Immune cell population</b>             | <b>Delta phase <math>\beta</math><br/>(95% CI)<sup>a</sup></b> | <b>p-value</b> |
|-------------------------------------------|----------------------------------------------------------------|----------------|
| Naïve B cells                             | 0.153 (-0.143 to 0.449)                                        | 0.308          |
| Memory B cells                            | -0.695 (-1.717 to 0.326)                                       | 0.180          |
| Plasma cells                              | -0.023 (-0.635 to 0.590)                                       | 0.942          |
| CD8 <sup>+</sup> T cells                  | -1.297 (-2.386 to -0.207)                                      | 0.020          |
| Naïve CD4 <sup>+</sup> T cells            | -0.263 (-0.581 to 0.056)                                       | 0.105          |
| Resting memory CD4 <sup>+</sup> T cells   | -0.087 (-0.187 to 0.013)                                       | 0.088          |
| Activated memory CD4 <sup>+</sup> T cells | 0.890 (-0.191 to 1.972)                                        | 0.105          |
| Resting NK-cells                          | -0.096 (-0.168 to -0.024)                                      | 0.009          |
| Monocytes                                 | 0.061 (-0.039 to 0.160)                                        | 0.228          |
| Activated dendritic cells                 | -0.267 (-1.146 to 0.611)                                       | 0.547          |
| Resting mast cells                        | 0.211 (-0.716 to 1.139)                                        | 0.652          |
| Eosinophils                               | -0.336 (-1.113 to 0.441)                                       | 0.392          |
| Neutrophils                               | 0.231 (0.067 to 0.39)                                          | 0.006          |

**Legend:** <sup>a</sup> $\beta$  reflects regression coefficient for Delta phase (hospitalization during Delta phase=1, hospitalization during either two prior phases=0) in a linear regression model with each log<sub>10</sub> immune cell abundance as dependent variable and age (continuous), sex (binary), HIV status (binary; 2 patients not known to be living with HIV but with missing rapid diagnostic tests analyzed as HIV negative), exposure to corticosteroids (binary), and WHO clinical severity (categorical) as independent co-variables; p-values reflect unadjusted two-sided Wald test of mediator regression coefficient.

**Abbreviations:** BH: Benjamini-Hochberg, CI: Confidence interval

**Supplemental Table 10: Optimal mediator-derived cluster partition (*k*) among patients with symptomatic COVID-19 (N=240).**

| <b>Index</b> | <b>Optimal number of clusters (<i>k</i>)</b> |
|--------------|----------------------------------------------|
| KL           | 2                                            |
| CH           | 2                                            |
| Hartigan     | 4                                            |
| CCC          | 2                                            |
| Scott        | 7                                            |
| Marriot      | 4                                            |
| TrCovW       | 3                                            |
| TraceW       | 4                                            |
| Friedman     | 3                                            |
| Rubin        | 7                                            |
| Cindex       | 4                                            |
| DB           | 2                                            |
| Silhouette   | 2                                            |
| Duda         | 2                                            |
| PseudoT2     | 2                                            |
| Beale        | 2                                            |
| Ratkowsky    | 2                                            |
| Ball         | 3                                            |
| PtBiserial   | 4                                            |
| McClain      | 2                                            |
| Dunn         | 7                                            |
| SDindex      | 3                                            |
| SDbw         | 12                                           |

**Supplemental Table 11: Immune mediator concentrations stratified by cluster-derived COVID-19 Response Signatures (CRS).**

| Mediator <sup>a</sup> | All patients<br>N=240 | CRS-1<br>N=142       | CRS-2<br>N=98        | P-value <sup>b</sup> |
|-----------------------|-----------------------|----------------------|----------------------|----------------------|
| sCD40L                | 3.80 [3.40, 4.00]     | 3.66 [3.18, 3.89]    | 3.96 [3.74, 4.07]    | <0.001               |
| EGF                   | 2.27 [1.95, 2.56]     | 2.13 [1.83, 2.54]    | 2.37 [2.11, 2.58]    | 0.014                |
| Eotaxin               | 1.46 [1.20, 1.64]     | 1.45 [1.19, 1.61]    | 1.48 [1.23, 1.69]    | 0.226                |
| FGF-2                 | 1.78 [1.54, 2.11]     | 1.64 [1.42, 1.87]    | 2.08 [1.82, 2.37]    | <0.001               |
| FLT-3L                | 1.38 [1.11, 1.64]     | 1.25 [1.02, 1.51]    | 1.56 [1.29, 1.78]    | <0.001               |
| Fractalkine           | 2.08 [1.95, 2.32]     | 2.00 [1.90, 2.12]    | 2.29 [2.13, 2.67]    | <0.001               |
| G-CSF <sup>c</sup>    | -0.18 [-0.18, 1.33]   | -0.18 [-0.18, 0.99]  | 1.14 [-0.18, 1.66]   | <0.001               |
| GM-CSF <sup>c</sup>   | -1.00 [-1.00, -1.00]  | -1.00 [-1.00, -1.00] | -1.00 [-1.00, 0.32]  | <0.001               |
| GRO- $\alpha$ /CXCL1  | 2.01 [1.83, 2.19]     | 1.95 [1.76, 2.13]    | 2.08 [1.94, 2.22]    | 0.001                |
| IFN- $\alpha$ 2       | 1.83 [1.62, 2.04]     | 1.71 [1.53, 1.85]    | 2.02 [1.84, 2.34]    | <0.001               |
| IFN- $\gamma$         | -0.03 [-1.40, 0.69]   | -1.20 [-1.40, 0.05]  | 0.67 [0.10, 1.19]    | <0.001               |
| IL-1 $\alpha$         | 1.41 [1.14, 1.75]     | 1.27 [1.05, 1.52]    | 1.68 [1.31, 2.11]    | <0.001               |
| IL-1 $\beta$          | 1.45 [1.11, 1.79]     | 1.31 [0.95, 1.55]    | 1.78 [1.46, 2.19]    | <0.001               |
| IL-1Ra                | 0.89 [0.55, 1.39]     | 0.67 [0.41, 0.92]    | 1.38 [0.96, 1.82]    | <0.001               |
| IL-2                  | 0.01 [-0.57, 0.52]    | -0.25 [-1.30, 0.12]  | 0.52 [0.05, 1.18]    | <0.001               |
| IL-3 <sup>c</sup>     | -2.00 [-2.00, -2.00]  | -2.00 [-2.00, -2.00] | -2.00 [-2.00, -0.73] | <0.001               |
| IL-4                  | 0.21 [-0.08, 0.48]    | 0.05 [-0.32, 0.27]   | 0.45 [0.25, 0.63]    | <0.001               |
| IL-5                  | 0.67 [0.25, 1.06]     | 0.60 [0.18, 0.98]    | 0.80 [0.38, 1.11]    | 0.020                |
| IL-6                  | 0.53 [0.11, 1.17]     | 0.29 [0.03, 0.67]    | 1.01 [0.49, 1.62]    | <0.001               |
| IL-7                  | 0.85 [0.57, 1.14]     | 0.71 [0.43, 0.98]    | 1.06 [0.78, 1.42]    | <0.001               |
| IL-8                  | 1.74 [1.27, 2.28]     | 1.61 [1.11, 2.10]    | 2.00 [1.50, 2.59]    | <0.001               |
| IL-9                  | 0.59 [-0.33, 0.94]    | 0.19 [-0.33, 0.70]   | 0.86 [0.55, 1.26]    | <0.001               |
| IL-10                 | 0.65 [0.16, 1.23]     | 0.53 [-0.17, 0.93]   | 0.92 [0.50, 1.55]    | <0.001               |
| IL-12p40              | 1.62 [1.26, 1.91]     | 1.53 [1.15, 1.73]    | 1.86 [1.54, 2.16]    | <0.001               |
| IL-12p70              | 0.42 [0.29, 0.62]     | 0.35 [0.23, 0.48]    | 0.60 [0.41, 1.09]    | <0.001               |
| IL-13                 | 1.87 [1.66, 2.17]     | 1.73 [1.54, 1.92]    | 2.18 [1.96, 2.53]    | <0.001               |
| IL-15                 | 1.35 [1.15, 1.66]     | 1.23 [1.03, 1.38]    | 1.65 [1.42, 1.96]    | <0.001               |
| IL-17A                | 0.97 [0.57, 1.38]     | 0.75 [0.40, 1.06]    | 1.33 [0.79, 1.78]    | <0.001               |
| IL-17E/IL-25          | 2.55 [2.30, 2.76]     | 2.41 [2.05, 2.60]    | 2.73 [2.57, 2.90]    | <0.001               |
| IL-17F                | 0.94 [-0.25, 1.48]    | 0.38 [-0.25, 1.23]   | 1.33 [0.77, 1.66]    | <0.001               |
| IL-18                 | 1.71 [1.44, 1.94]     | 1.63 [1.40, 1.87]    | 1.80 [1.61, 2.09]    | <0.001               |
| IL-22                 | 1.81 [1.26, 2.07]     | 1.61 [0.84, 1.83]    | 2.08 [1.90, 2.30]    | <0.001               |
| IL-27                 | 3.17 [2.90, 3.38]     | 3.07 [2.82, 3.32]    | 3.31 [3.09, 3.50]    | <0.001               |
| IP-10/CXCL10          | 2.34 [2.02, 2.75]     | 2.24 [1.94, 2.54]    | 2.50 [2.21, 3.32]    | <0.001               |
| MCP-1                 | 2.35 [2.18, 2.48]     | 2.31 [2.16, 2.44]    | 2.40 [2.24, 2.53]    | 0.006                |
| MCP-3                 | 1.25 [1.09, 1.58]     | 1.13 [1.03, 1.27]    | 1.59 [1.29, 1.95]    | <0.001               |
| M-CSF                 | 2.16 [1.87, 2.42]     | 2.04 [1.69, 2.31]    | 2.32 [2.10, 2.62]    | <0.001               |
| MDC                   | 3.03 [2.82, 3.18]     | 3.06 [2.87, 3.21]    | 2.98 [2.79, 3.16]    | 0.102                |
| MIG/CXCL9             | 3.48 [3.25, 3.68]     | 3.39 [3.18, 3.61]    | 3.56 [3.36, 3.85]    | <0.001               |
| MIP-1 $\alpha$ /CCL3  | 1.63 [1.44, 2.12]     | 1.50 [1.37, 1.69]    | 1.88 [1.65, 2.72]    | <0.001               |
| MIP-1 $\beta$ /CCL4   | 1.83 [1.63, 2.04]     | 1.74 [1.57, 1.97]    | 1.94 [1.78, 2.20]    | <0.001               |
| PDGF-AA               | 3.54 [3.40, 3.69]     | 3.51 [3.38, 3.65]    | 3.63 [3.44, 3.76]    | 0.006                |
| PDGF-AB/BB            | 4.47 [4.42, 4.52]     | 4.47 [4.42, 4.53]    | 4.46 [4.42, 4.51]    | 0.291                |
| RANTES/CCL5           | 3.38 [3.25, 3.49]     | 3.39 [3.28, 3.49]    | 3.35 [3.23, 3.48]    | 0.101                |
| TGF- $\alpha$         | 1.08 [0.77, 1.49]     | 0.92 [0.65, 1.20]    | 1.30 [1.01, 1.69]    | <0.001               |
| TNF                   | 1.81 [1.65, 2.05]     | 1.72 [1.58, 1.82]    | 2.08 [1.88, 2.37]    | <0.001               |
| Lymphotoxin- $\alpha$ | 1.38 [1.13, 1.67]     | 1.20 [1.00, 1.40]    | 1.72 [1.48, 1.87]    | <0.001               |
| VEGF-A                | 2.58 [2.33, 2.86]     | 2.49 [2.20, 2.71]    | 2.78 [2.51, 3.03]    | <0.001               |

**Legend:** <sup>a</sup>Mediator concentrations presented as log<sub>10</sub> pg/ml with median and interquartile range; <sup>b</sup>Reflects results of unadjusted two-sided Wilcoxon rank-sum test; <sup>c</sup>Large proportion of values below the lower limit of quantification (see Supplemental Table 15).



**Supplemental Table 12: Association between mediator concentrations and HIV co-infection among patients with SARS-CoV-2 (N=302; 4 patients without definitive assessment of HIV status excluded).**

| Mediator             | $\beta$ for HIV co-infection (95% CI) <sup>a</sup> | Nominal p-value | BH-adjusted p-value |
|----------------------|----------------------------------------------------|-----------------|---------------------|
| sCD40L               | -0.038 (-0.295 to 0.219)                           | 0.769           | 0.785362            |
| EGF                  | -0.195 (-0.385 to -0.004)                          | 0.045           | 0.1632              |
| Eotaxin              | 0.029 (-0.086 to 0.144)                            | 0.621           | 0.699273            |
| FGF-2                | -0.227 (-0.422 to -0.032)                          | 0.023           | 0.1632              |
| FLT-3L               | -0.113 (-0.276 to 0.050)                           | 0.175           | 0.343385            |
| Fractalkine          | -0.093 (-0.210 to 0.025)                           | 0.122           | 0.266182            |
| G-CSF <sup>b</sup>   | -0.122 (-0.440 to 0.196)                           | 0.450           | 0.568421            |
| GM-CSF <sup>b</sup>  | 0.002 (-0.315 to 0.320)                            | 0.990           | 0.99                |
| GRO $\alpha$ /CXCL1  | -0.113 (-0.217 to -0.010)                          | 0.032           | 0.1632              |
| IFN- $\alpha$ 2      | -0.212 (-0.393 to -0.031)                          | 0.022           | 0.1632              |
| IFN- $\gamma$        | -0.250 (-0.650 to 0.150)                           | 0.219           | 0.3504              |
| IL-1 $\alpha$        | -0.125 (-0.336 to 0.087)                           | 0.247           | 0.3705              |
| IL-1 $\beta$         | -0.349 (-0.563 to -0.135)                          | 0.001           | 0.048               |
| IL-1Ra               | -0.230 (-0.455 to -0.005)                          | 0.045           | 0.1632              |
| IL-2                 | -0.382 (-0.736 to -0.028)                          | 0.034           | 0.1632              |
| IL-3 <sup>b</sup>    | 0.302 (-0.583 to -0.021)                           | 0.035           | 0.1632              |
| IL-4                 | -0.213 (-0.455 to 0.030)                           | 0.085           | 0.214737            |
| IL-5                 | 0.235 (0.011 to 0.458)                             | 0.040           | 0.1632              |
| IL-6                 | -0.063 (-0.323 to 0.196)                           | 0.630           | 0.699273            |
| IL-7                 | -0.047 (-0.224 to 0.129)                           | 0.597           | 0.698927            |
| IL-8                 | -0.174 (-0.452 to 0.103)                           | 0.218           | 0.3504              |
| IL-9                 | -0.129 (-0.369 to 0.110)                           | 0.288           | 0.406588            |
| IL-10                | -0.071 (-0.449 to 0.306)                           | 0.710           | 0.757333            |
| IL-12p40             | -0.292 (-0.550 to -0.033)                          | 0.027           | 0.1632              |
| IL-12p70             | -0.087 (-0.266 to 0.092)                           | 0.340           | 0.453333            |
| IL-13                | -0.138 (-0.309 to 0.034)                           | 0.115           | 0.262857            |
| IL-15                | -0.158 (-0.322 to 0.005)                           | 0.058           | 0.174               |
| IL-17A               | -0.275 (-0.542 to -0.008)                          | 0.043           | 0.1632              |
| IL-17E/IL-25         | -0.173 (-0.386 to 0.040)                           | 0.111           | 0.262857            |
| IL-17F               | -0.316 (-0.656 to 0.025)                           | 0.069           | 0.194824            |
| IL-18                | -0.081 (-0.258 to 0.097)                           | 0.371           | 0.481297            |
| IL-22                | -0.105 (-0.302 to 0.093)                           | 0.299           | 0.410057            |
| IL-27                | -0.081 (-0.219 to 0.057)                           | 0.247           | 0.3705              |
| IP-10/CXCL10         | 0.078 (-0.163 to 0.318)                            | 0.526           | 0.647385            |
| MCP-1                | 0.065 (-0.021 to 0.152)                            | 0.137           | 0.285913            |
| MCP-3                | 0.023 (-0.130 to 0.176)                            | 0.766           | 0.785362            |
| M-CSF                | -0.055 (-0.288 to 0.178)                           | 0.641           | 0.699273            |
| MDC                  | -0.054 (-0.150 to 0.043)                           | 0.275           | 0.400               |
| MIG/CXCL9            | 0.083 (-0.038 to 0.203)                            | 0.180           | 0.343385            |
| MIP-1 $\alpha$ /CCL3 | -0.284 (-0.519 to -0.050)                          | 0.018           | 0.1632              |
| MIP-1 $\beta$ /CCL4  | -0.082 (-0.210 to 0.047)                           | 0.211           | 0.3504              |
| PDGF-AA              | -0.096 (-0.192 to 0.000)                           | 0.051           | 0.1632              |
| PDGF-AB/BB           | -0.054 (-0.091 to -0.016)                          | 0.005           | 0.120               |
| RANTES               | 0.026 (-0.064 to 0.116)                            | 0.572           | 0.6864              |

|               |                          |       |          |
|---------------|--------------------------|-------|----------|
| TGF- $\alpha$ | -0.197 (-0.394 to 0.000) | 0.050 | 0.1632   |
| TNF           | -0.079 (-0.204 to 0.046) | 0.216 | 0.3504   |
| LT- $\alpha$  | -0.133 (-0.281 to 0.015) | 0.079 | 0.210667 |
| VEGF-A        | -0.111 (-0.276 to 0.054) | 0.186 | 0.343385 |

**Legend:** <sup>a</sup> $\beta$  reflects regression coefficient for HIV co-infection (living with HIV=1, not living with HIV=0) in a linear regression model with each  $\log_{10}$  mediator concentration as dependent variable and age (continuous), sex (binary), and WHO clinical severity (categorical) as independent co-variables; p-values reflect two-sided Wald test of mediator regression coefficient, adjusted using Benjamini-Hochberg method; <sup>b</sup>Large proportion of values below the lower limit of quantification (see Supplemental Table 15).

**Abbreviations:** BH: Benjamini-Hochberg, CI: confidence interval

**Supplemental Table 13: Association between COVID-19 status and immune mediator concentrations among patients with COVID-19, influenza SARI, and non-influenza SARI in Uganda (N=292; 66 patients with asymptomatic SARS-CoV-2 infection excluded).**

| Mediator             | COVID-19 $\beta$<br>(95% CI) <sup>a</sup> | Nominal p-value | BH-adjusted p-value |
|----------------------|-------------------------------------------|-----------------|---------------------|
| sCD40L               | 0.074 (-0.149 to 0.297)                   | 0.513           | 0.684               |
| EGF                  | 0.656 (0.477 to 0.836)                    | <0.001          | 0.0048              |
| Eotaxin              | 0.193 (0.080 to 0.307)                    | <0.001          | 0.0048              |
| FGF-2                | 0.067 (-0.109 to 0.243)                   | 0.453           | 0.639529            |
| FLT-3L               | 0.231 (0.081 to 0.382)                    | 0.003           | 0.013091            |
| Fractalkine          | -0.006 (-0.117 to 0.105)                  | 0.92            | 0.975652            |
| G-CSF <sup>b</sup>   | -0.179 (-0.488 to 0.130)                  | 0.255           | 0.3825              |
| GM-CSF <sup>b</sup>  | 0.006 (-0.295 to 0.308)                   | 0.968           | 0.981               |
| GRO $\alpha$ /CXCL1  | 0.035 (-0.060 to 0.130)                   | 0.47            | 0.644571            |
| IFN- $\alpha$ 2      | 0.106 (-0.069 to 0.281)                   | 0.235           | 0.3824              |
| IFN- $\gamma$        | -0.289 (-0.657 to 0.078)                  | 0.122           | 0.23424             |
| IL-1 $\alpha$        | 0.009 (-0.179 to 0.196)                   | 0.929           | 0.975652            |
| IL-1 $\beta$         | -0.015 (-0.212 to 0.182)                  | 0.884           | 0.975652            |
| IL-1Ra               | -0.197 (-0.411 to 0.017)                  | 0.071           | 0.158609            |
| IL-2                 | 0.018 (-0.310 to 0.346)                   | 0.914           | 0.975652            |
| IL-3 <sup>b</sup>    | 0.038 (-0.194 to 0.269)                   | 0.75            | 0.923077            |
| IL-4                 | 0.215 (-0.012 to 0.442)                   | 0.063           | 0.158609            |
| IL-5                 | -0.114 (-0.306 to 0.077)                  | 0.239           | 0.3824              |
| IL-6                 | -0.290 (-0.543 to -0.037)                 | 0.025           | 0.092308            |
| IL-7                 | 0.1 (-0.071 to 0.271)                     | 0.25            | 0.3825              |
| IL-8                 | 0.483 (0.249 to 0.716)                    | <0.001          | 0.0048              |
| IL-9                 | 0.228 (0.013 to 0.444)                    | 0.038           | 0.12                |
| IL-10                | -0.737 (-1.072 to -0.401)                 | <0.001          | 0.0048              |
| IL-12p40             | 0.177 (-0.073 to 0.426)                   | 0.165           | 0.304615            |
| IL-12p70             | -0.023 (-0.194 to 0.148)                  | 0.79            | 0.948               |
| IL-13                | 0.002 (-0.156 to 0.160)                   | 0.981           | 0.981               |
| IL-15                | 0.014 (-0.131 to 0.159)                   | 0.851           | 0.975652            |
| IL-17A               | 0.04 (-0.204 to 0.284)                    | 0.747           | 0.923077            |
| IL-17E/IL-25         | 0.201 (0.006 to 0.395)                    | 0.043           | 0.121412            |
| IL-17F               | 0.274 (-0.029 to 0.577)                   | 0.076           | 0.158609            |
| IL-18                | -0.193 (-0.364 to -0.023)                 | 0.027           | 0.092571            |
| IL-22                | 0.112 (-0.071 to 0.295)                   | 0.231           | 0.3824              |
| IL-27                | -0.359 (-0.491 to -0.228)                 | <0.001          | 0.0048              |
| IP-10/CXCL10         | -0.440 (-0.696 to -0.184)                 | <0.001          | 0.0048              |
| MCP-1                | 0.004 (-0.082 to 0.089)                   | 0.935           | 0.975652            |
| MCP-3                | 0.124 (-0.012 to 0.260)                   | 0.074           | 0.158609            |
| M-CSF                | 0.507 (0.270 to 0.744)                    | <0.001          | 0.0048              |
| MDC                  | 0.073 (-0.012 to 0.157)                   | 0.094           | 0.188               |
| MIG/CXCL9            | -0.337 (-0.455 to -0.218)                 | <0.001          | 0.0048              |
| MIP-1 $\alpha$ /CCL3 | 0.205 (-0.002 to 0.413)                   | 0.052           | 0.138667            |
| MIP-1 $\beta$ /CCL4  | 0.074 (-0.035 to 0.184)                   | 0.184           | 0.327111            |
| PDGF-AA              | 0.267 (0.175 to 0.359)                    | <0.001          | 0.0048              |
| PDGF-AB/BB           | 0.082 (0.043 to 0.122)                    | <0.001          | 0.0048              |
| RANTES/CCL5          | 0.102 (0.025 to 0.179)                    | 0.01            | 0.04                |

|               |                          |       |          |
|---------------|--------------------------|-------|----------|
| TGF- $\alpha$ | 0.179 (0.008 to 0.350)   | 0.04  | 0.12     |
| TNF           | -0.061 (-0.177 to 0.055) | 0.303 | 0.440727 |
| LT- $\alpha$  | -0.023 (-0.159 to 0.113) | 0.738 | 0.923077 |
| VEGF-A        | 0.147 (-0.012 to 0.305)  | 0.069 | 0.158609 |

Legend: <sup>a</sup> $\beta$  reflects regression coefficient for COVID-19 status (binary; SARS-CoV-2 positive=1, influenza or non-influenza SARI=0) in a linear regression model with each log<sub>10</sub> mediator concentration as dependent variable and age (continuous), sex (binary), HIV status (binary; 4 patients not known to be living with HIV but with missing rapid diagnostic tests analyzed as HIV negative) and WHO clinical severity status (categorical) as independent co-variables; p-values reflect two-sided Wald test of mediator regression coefficient, adjusted using Benjamini-Hochberg method; <sup>b</sup>Large proportion of values below the lower limit of quantification (see Supplemental Table 15).

Abbreviations: BH: Benjamini-Hochberg, CI: confidence interval

**Supplemental Table 14: Immune mediator concentrations stratified by SARI etiology (N=292; 66 patients with asymptomatic SARS-CoV-2 infection excluded).**

| Mediator <sup>a</sup> | All patients<br>N=292 | COVID-19<br>N=240    | Influenza SARI<br>N=15 | Non-influenza SARI<br>N=37 | p-value <sup>b</sup> |
|-----------------------|-----------------------|----------------------|------------------------|----------------------------|----------------------|
| sCD40L                | 3.76 [3.39, 3.98]     | 3.80 [3.40, 4.00]    | 3.66 [3.26, 3.87]      | 3.68 [3.41, 3.85]          | 0.175                |
| EGF                   | 2.15 [1.78, 2.51]     | 2.27 [1.95, 2.56]    | 1.32 [0.24, 1.96]      | 1.70 [1.28, 2.07]          | <0.001               |
| Eotaxin               | 1.45 [1.18, 1.62]     | 1.46 [1.20, 1.64]    | 1.41 [1.21, 1.61]      | 1.33 [0.94, 1.48]          | 0.018                |
| FGF-2                 | 1.79 [1.55, 2.13]     | 1.78 [1.54, 2.11]    | 1.68 [1.60, 1.86]      | 1.86 [1.65, 2.31]          | 0.157                |
| FLT-3L                | 1.35 [1.08, 1.61]     | 1.38 [1.11, 1.64]    | 1.20 [1.07, 1.44]      | 1.14 [0.79, 1.40]          | 0.003                |
| Fractalkine           | 2.08 [1.94, 2.32]     | 2.08 [1.95, 2.32]    | 2.16 [2.05, 2.43]      | 2.06 [1.91, 2.32]          | 0.698                |
| G-CSF <sup>c</sup>    | -0.18 [-0.18, 1.40]   | -0.18 [-0.18, 1.33]  | 1.88 [-0.18, 2.06]     | -0.18 [-0.18, 1.32]        | 0.025                |
| GM-CSF <sup>c</sup>   | -1.00 [-1.00, -1.00]  | -1.00 [-1.00, -1.00] | -1.00 [-1.00, -1.00]   | -1.00 [-1.00, -1.00]       | 0.769                |
| GRO $\alpha$ /CXCL1   | 2.01 [1.83, 2.17]     | 2.01 [1.83, 2.19]    | 2.07 [1.93, 2.44]      | 1.98 [1.79, 2.08]          | 0.064                |
| IFN- $\alpha$ 2       | 1.83 [1.61, 2.07]     | 1.83 [1.62, 2.04]    | 1.72 [1.37, 2.06]      | 1.96 [1.67, 2.36]          | 0.256                |
| IFN- $\gamma$         | 0.01 [-1.40, 0.79]    | -0.03 [-1.40, 0.69]  | 0.30 [-0.78, 0.69]     | 0.31 [-1.40, 1.25]         | 0.183                |
| IL-1 $\alpha$         | 1.41 [1.14, 1.77]     | 1.41 [1.14, 1.75]    | 1.35 [1.05, 1.68]      | 1.50 [1.25, 2.20]          | 0.358                |
| IL-1 $\beta$          | 1.44 [1.11, 1.82]     | 1.45 [1.11, 1.79]    | 1.20 [0.82, 1.64]      | 1.72 [1.14, 2.19]          | 0.028                |
| IL-1Ra                | 0.93 [0.56, 1.46]     | 0.89 [0.55, 1.39]    | 1.25 [0.76, 1.75]      | 1.08 [0.71, 1.76]          | 0.116                |
| IL-2                  | 0.02 [-0.57, 0.55]    | 0.01 [-0.57, 0.52]   | -0.32 [-1.70, 0.23]    | 0.36 [-0.25, 1.26]         | 0.015                |
| IL-3 <sup>c</sup>     | -2.00 [-2.00, -2.00]  | -2.00 [-2.00, -2.00] | -2.00 [-2.00, -2.00]   | -2.00 [-2.00, -1.52]       | 0.512                |
| IL-4                  | 0.19 [-0.12, 0.48]    | 0.21 [-0.08, 0.48]   | 0.10 [-0.39, 0.48]     | 0.11 [-0.37, 0.42]         | 0.359                |
| IL-5                  | 0.70 [0.27, 1.08]     | 0.67 [0.25, 1.06]    | 0.69 [0.50, 1.00]      | 0.84 [0.46, 1.24]          | 0.237                |
| IL-6                  | 0.57 [0.12, 1.22]     | 0.53 [0.11, 1.17]    | 1.29 [0.90, 1.48]      | 0.70 [0.13, 1.18]          | 0.017                |
| IL-7                  | 0.85 [0.58, 1.13]     | 0.85 [0.57, 1.14]    | 0.87 [0.69, 1.06]      | 0.84 [0.60, 1.11]          | 0.989                |
| IL-8                  | 1.64 [1.20, 2.19]     | 1.74 [1.27, 2.28]    | 1.28 [0.91, 1.57]      | 1.36 [1.07, 1.67]          | <0.001               |
| IL-9                  | 0.56 [-0.33, 0.90]    | 0.59 [-0.33, 0.94]   | 0.53 [-0.33, 0.77]     | -0.23 [-0.33, 0.89]        | 0.162                |
| IL-10                 | 0.74 [0.26, 1.38]     | 0.65 [0.16, 1.23]    | 1.11 [0.72, 1.54]      | 1.34 [0.79, 1.70]          | <0.001               |
| IL-12p40              | 1.62 [1.25, 1.92]     | 1.62 [1.26, 1.91]    | 1.41 [1.12, 2.13]      | 1.63 [0.79, 2.09]          | 0.953                |
| IL-12p70              | 0.42 [0.29, 0.63]     | 0.42 [0.29, 0.62]    | 0.48 [0.23, 0.59]      | 0.39 [0.18, 0.74]          | 0.879                |
| IL-13                 | 1.87 [1.65, 2.17]     | 1.87 [1.66, 2.17]    | 1.77 [1.39, 1.97]      | 1.89 [1.69, 2.19]          | 0.292                |
| IL-15                 | 1.36 [1.12, 1.65]     | 1.35 [1.15, 1.66]    | 1.47 [1.42, 1.62]      | 1.27 [1.03, 1.61]          | 0.387                |
| IL-17A                | 0.97 [0.56, 1.42]     | 0.97 [0.57, 1.38]    | 0.72 [0.33, 1.07]      | 1.33 [0.63, 1.81]          | 0.029                |
| IL-17E/IL-25          | 2.53 [2.28, 2.75]     | 2.55 [2.30, 2.76]    | 2.49 [2.28, 2.62]      | 2.45 [1.97, 2.76]          | 0.327                |
| IL-17F                | 0.87 [-0.25, 1.48]    | 0.94 [-0.25, 1.48]   | 0.87 [-0.25, 1.19]     | 0.07 [-0.25, 1.60]         | 0.231                |
| IL-18                 | 1.72 [1.46, 1.99]     | 1.71 [1.44, 1.94]    | 1.88 [1.72, 2.18]      | 1.92 [1.48, 2.24]          | 0.021                |
| IL-22                 | 1.79 [1.21, 2.04]     | 1.81 [1.26, 2.07]    | 1.50 [0.84, 1.97]      | 1.74 [0.84, 1.97]          | 0.326                |
| IL-27                 | 3.22 [2.94, 3.46]     | 3.17 [2.90, 3.38]    | 3.68 [3.30, 3.95]      | 3.49 [3.28, 3.77]          | <0.001               |
| IP-10/CXCL10          | 2.38 [2.04, 2.87]     | 2.34 [2.02, 2.75]    | 3.34 [2.57, 3.78]      | 2.43 [2.22, 3.11]          | 0.007                |
| MCP-1                 | 2.34 [2.18, 2.49]     | 2.35 [2.18, 2.48]    | 2.54 [2.35, 2.63]      | 2.27 [2.09, 2.38]          | 0.006                |
| MCP-3                 | 1.23 [1.09, 1.53]     | 1.25 [1.09, 1.58]    | 1.15 [1.04, 1.23]      | 1.20 [1.00, 1.36]          | 0.101                |
| M-CSF                 | 2.12 [1.83, 2.40]     | 2.16 [1.87, 2.42]    | 2.12 [1.91, 2.51]      | 1.87 [1.17, 2.14]          | 0.001                |
| MDC                   | 3.01 [2.80, 3.17]     | 3.03 [2.82, 3.18]    | 2.92 [2.79, 3.25]      | 2.95 [2.79, 3.06]          | 0.245                |
| MIG/CXCL9             | 3.53 [3.28, 3.76]     | 3.48 [3.25, 3.68]    | 3.80 [3.53, 4.04]      | 3.76 [3.55, 4.14]          | <0.001               |
| MIP-1 $\alpha$ /CCL3  | 1.60 [1.43, 2.05]     | 1.63 [1.44, 2.12]    | 1.46 [1.40, 1.53]      | 1.55 [1.40, 2.09]          | 0.019                |
| MIP-1 $\beta$ /CCL4   | 1.82 [1.62, 2.02]     | 1.83 [1.63, 2.04]    | 1.68 [1.56, 1.95]      | 1.85 [1.58, 1.95]          | 0.160                |
| PDGF-AA               | 3.50 [3.34, 3.68]     | 3.54 [3.40, 3.69]    | 3.33 [3.17, 3.66]      | 3.30 [3.07, 3.42]          | <0.001               |
| PDGF-AB/BB            | 4.46 [4.40, 4.52]     | 4.47 [4.42, 4.52]    | 4.42 [4.36, 4.46]      | 4.39 [4.35, 4.44]          | <0.001               |
| RANTES                | 3.36 [3.23, 3.47]     | 3.38 [3.25, 3.49]    | 3.26 [3.16, 3.49]      | 3.26 [3.16, 3.35]          | 0.001                |
| TGF- $\alpha$         | 1.06 [0.74, 1.40]     | 1.08 [0.77, 1.49]    | 0.80 [0.63, 1.12]      | 0.96 [0.64, 1.17]          | 0.043                |
| TNF                   | 1.83 [1.67, 2.09]     | 1.81 [1.65, 2.05]    | 1.95 [1.80, 2.18]      | 1.93 [1.69, 2.15]          | 0.210                |
| LT- $\alpha$          | 1.38 [1.13, 1.68]     | 1.38 [1.13, 1.67]    | 1.21 [1.07, 1.64]      | 1.43 [1.18, 1.72]          | 0.589                |
| VEGF-A                | 2.56 [2.31, 2.84]     | 2.58 [2.33, 2.86]    | 2.37 [2.17, 2.90]      | 2.49 [2.25, 2.71]          | 0.189                |

**Legend:** <sup>a</sup>Mediator concentrations presented as log<sub>10</sub> pg/ml with median and interquartile range; <sup>b</sup>Reflects results of Kruskal-Wallis H test; <sup>c</sup>Large proportion of values below the lower limit of quantification (see Supplemental Table 15).

**Supplemental Table 15: Proportions of immune mediator concentrations outside the limits of quantification in multiplexed immunoassay**

| Mediator             | Proportion of values below lower limit of quantification (%) | Proportion of values above upper limit of quantification (%) |
|----------------------|--------------------------------------------------------------|--------------------------------------------------------------|
| sCD40L               | 0                                                            | 0                                                            |
| EGF                  | 2.2                                                          | 0                                                            |
| Eotaxin              | 0                                                            | 0                                                            |
| FGF-2                | 2.2                                                          | 0                                                            |
| FLT-3L               | 1.1                                                          | 0                                                            |
| Fractalkine          | 0                                                            | 0                                                            |
| G-CSF                | 55.2                                                         | 0                                                            |
| GM-CSF               | 89.1                                                         | 0                                                            |
| GRO $\alpha$ /CXCL1  | 0                                                            | 0                                                            |
| IFN- $\alpha$ 2      | 4.2                                                          | 0                                                            |
| IFN- $\gamma$        | 32.2                                                         | 0                                                            |
| IL-1 $\alpha$        | 0                                                            | 0                                                            |
| IL-1 $\beta$         | 0.8                                                          | 0                                                            |
| IL-1Ra               | 0                                                            | 0                                                            |
| IL-2                 | 14                                                           | 0                                                            |
| IL-3                 | 75.6                                                         | 0                                                            |
| IL-4                 | 9                                                            | 0                                                            |
| IL-5                 | 0                                                            | 0                                                            |
| IL-6                 | 0                                                            | 0                                                            |
| IL-7                 | 1.1                                                          | 0                                                            |
| IL-8                 | 0                                                            | 0                                                            |
| IL-9                 | 35                                                           | 0                                                            |
| IL-10                | 9                                                            | 0                                                            |
| IL-12p40             | 8.4                                                          | 0                                                            |
| IL-12p70             | 0                                                            | 0                                                            |
| IL-13                | 2                                                            | 0                                                            |
| IL-15                | 0                                                            | 0                                                            |
| IL-17A               | 2.2                                                          | 0                                                            |
| IL-17E/IL-25         | 8.4                                                          | 0                                                            |
| IL-17F               | 35.6                                                         | 0                                                            |
| IL-18                | 1.4                                                          | 0                                                            |
| IL-22                | 22.4                                                         | 0                                                            |
| IL-27                | 0                                                            | 0                                                            |
| IP-10/CXCL10         | 0                                                            | 0                                                            |
| MCP-1                | 0                                                            | 0                                                            |
| MCP-3                | 0.3                                                          | 0                                                            |
| M-CSF                | 4.5                                                          | 0                                                            |
| MDC                  | 0                                                            | 0                                                            |
| MIG/CXCL9            | 0                                                            | 0                                                            |
| MIP-1 $\alpha$ /CCL3 | 0.3                                                          | 0                                                            |
| MIP-1 $\beta$ /CCL4  | 0                                                            | 0                                                            |
| PDGF-AA              | 0                                                            | 0                                                            |
| PDGF-AB/BB           | 0                                                            | 0.3                                                          |
| RANTES               | 0                                                            | 0                                                            |
| TGF- $\alpha$        | 0                                                            | 0                                                            |
| TNF                  | 0                                                            | 0                                                            |
| LT- $\alpha$         | 0                                                            | 0                                                            |
| VEGF-A               | 0                                                            | 0                                                            |

**Supplemental Table 16: Missing clinical and laboratory variables and imputation approach**

| <b>Variable</b>                          | <b>Proportion of symptomatic COVID-19 patients with missing data (%)</b> | <b>Approach to imputation<sup>a</sup></b>         |
|------------------------------------------|--------------------------------------------------------------------------|---------------------------------------------------|
| Age                                      | 0.0                                                                      | N/A                                               |
| Sex                                      | 0.0                                                                      | N/A                                               |
| Karnofsky Performance Status             | 0.0                                                                      | N/A                                               |
| Symptom duration at enrollment           | 14.6                                                                     | Multiple imputation via chained equations and PMM |
| Temperature                              | 2.5                                                                      | Multiple imputation via chained equations and PMM |
| Heart rate                               | 0.42                                                                     | Multiple imputation via chained equations and PMM |
| Respiratory rate                         | 5.4                                                                      | Multiple imputation via chained equations and PMM |
| Systolic blood pressure                  | 0.42                                                                     | Multiple imputation via chained equations and PMM |
| Peripheral oxygen saturation             | 0.0                                                                      | N/A                                               |
| Whole-blood lactate concentration        | 10.0                                                                     | Multiple imputation via chained equations and PMM |
| Hemoglobin concentration                 | 62.5                                                                     | Multiple imputation via chained equations and PMM |
| White blood cell count                   | 62.9                                                                     | Multiple imputation via chained equations and PMM |
| Platelet count                           | 62.9                                                                     | Multiple imputation via chained equations and PMM |
| Duration of hospitalization <sup>b</sup> | 4.2                                                                      | Multiple imputation via chained equations and PMM |

Legend: <sup>a</sup>Multiple imputation via chained equations and PMM performed using all clinical and laboratory variables as predictors; <sup>b</sup>Hospital outcome (death or transfer vs. discharge alive) also used as predictor.

Abbreviations: PMM: predictive mean matching

Supplemental Figures

Supplemental Figure 1: Flow diagram for adult patients prospectively enrolled in RESERVE-U-C19. Figure created in Biorender.

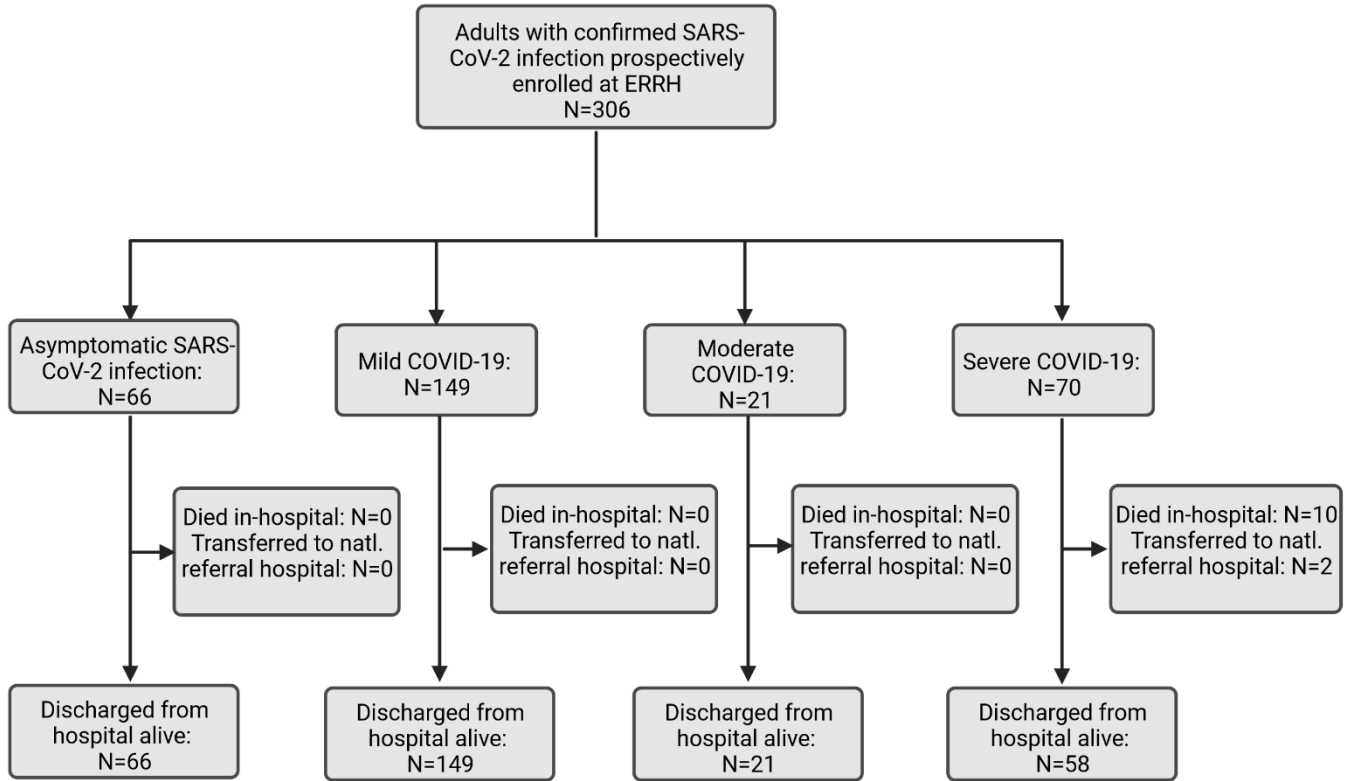



**Supplemental Figure 2: Immune mediator concentrations stratified by COVID-19 severity in persons living with HIV (N=33).**

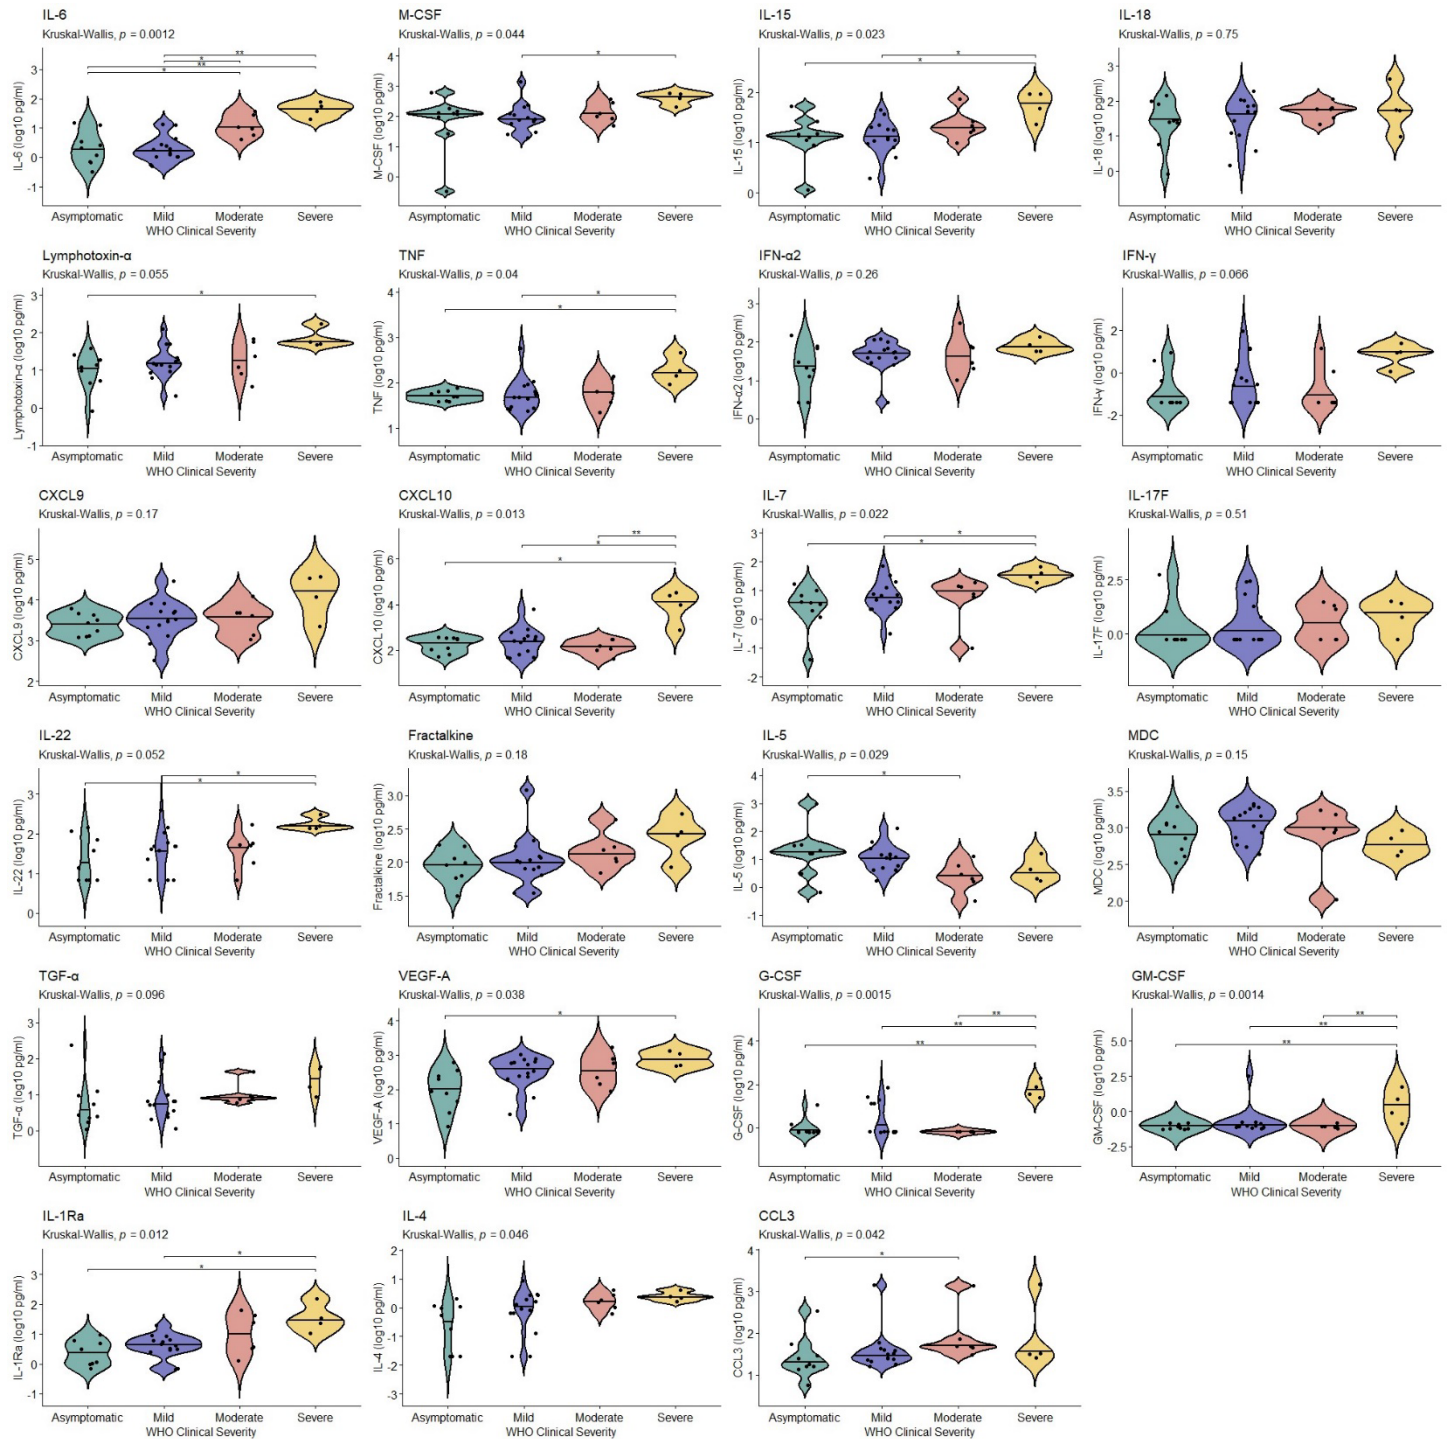

Mediators significantly associated with escalating COVID-19 severity in general study population and representative of key immunopathological domains presented along with other mediators significantly associated with COVID-19 severity in persons living with HIV ( $p \leq 0.05$  in Kruskal-Wallis H test). Source data are provided as a Source Data file.

**Supplemental Figure 3: Associations between immune mediator concentrations and COVID-19 severity risk in persons living with HIV (PLWH) and those without HIV.**

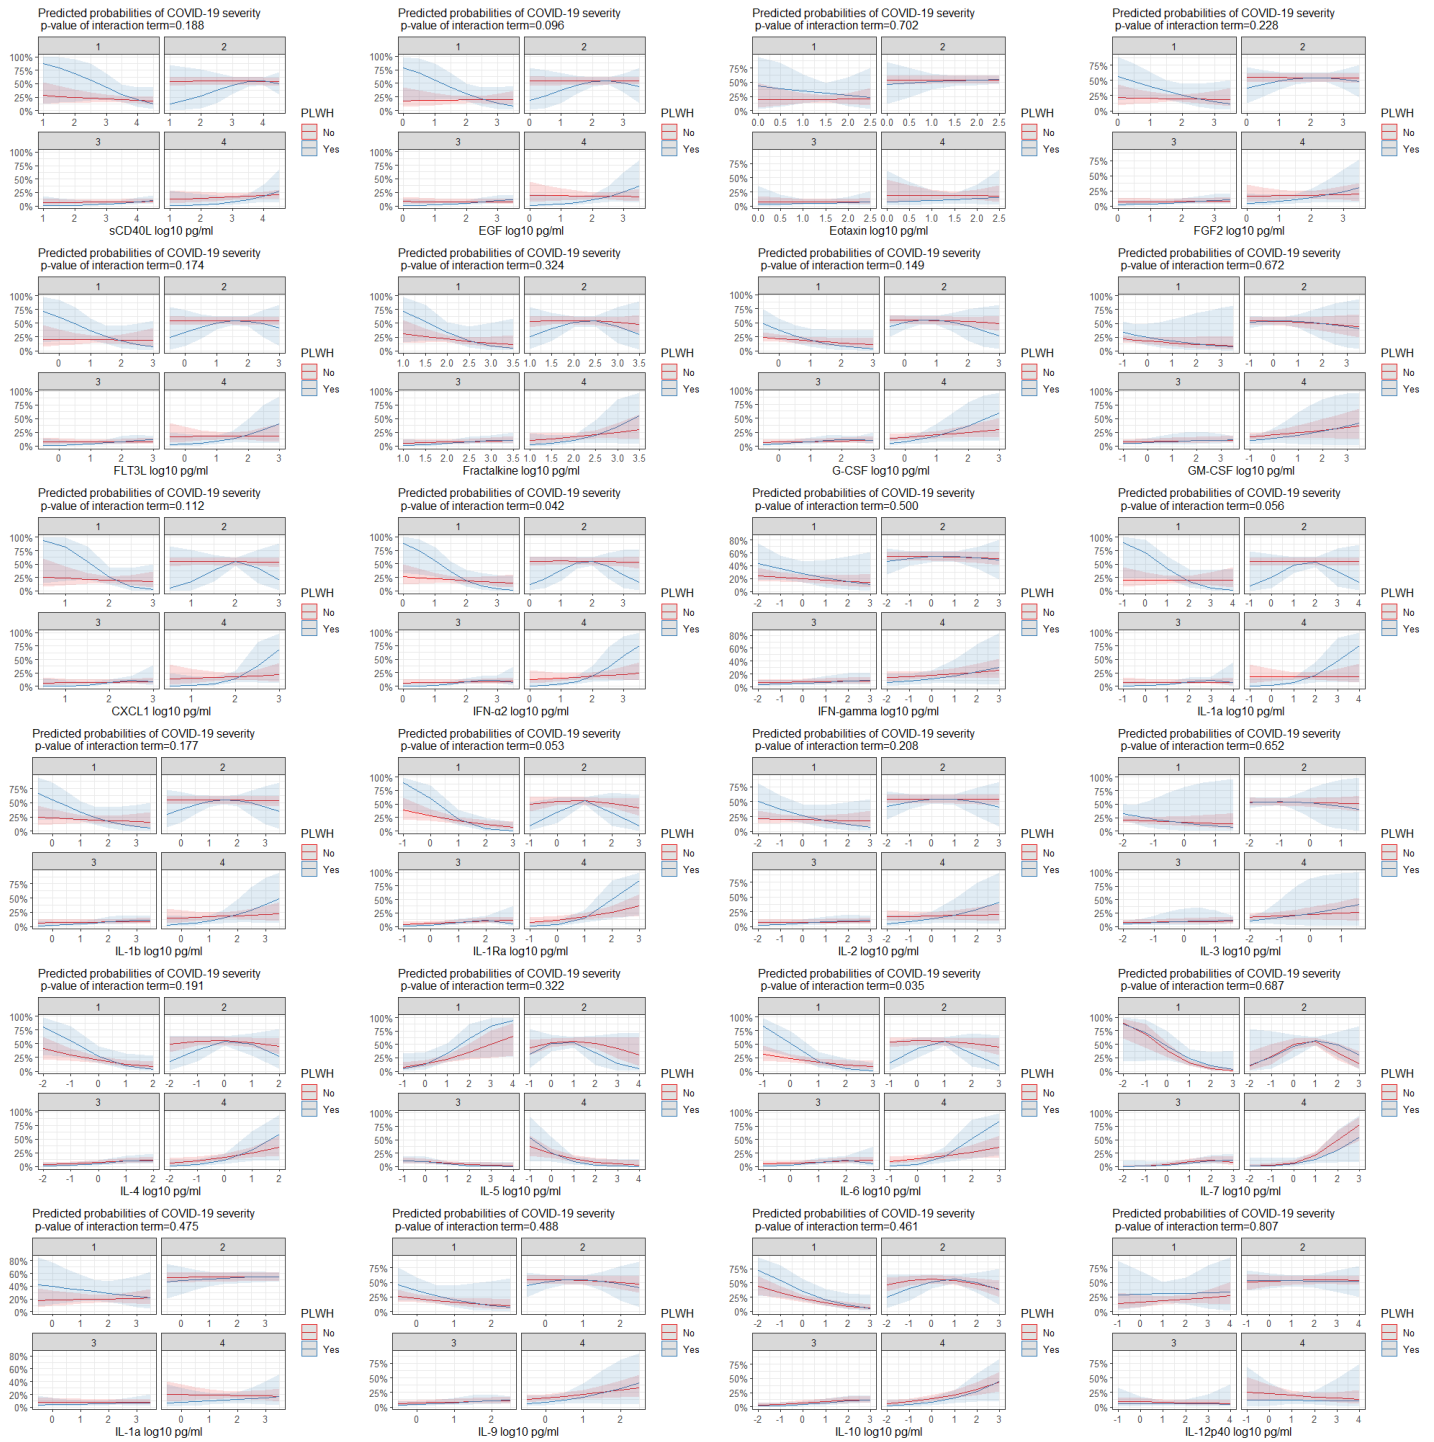

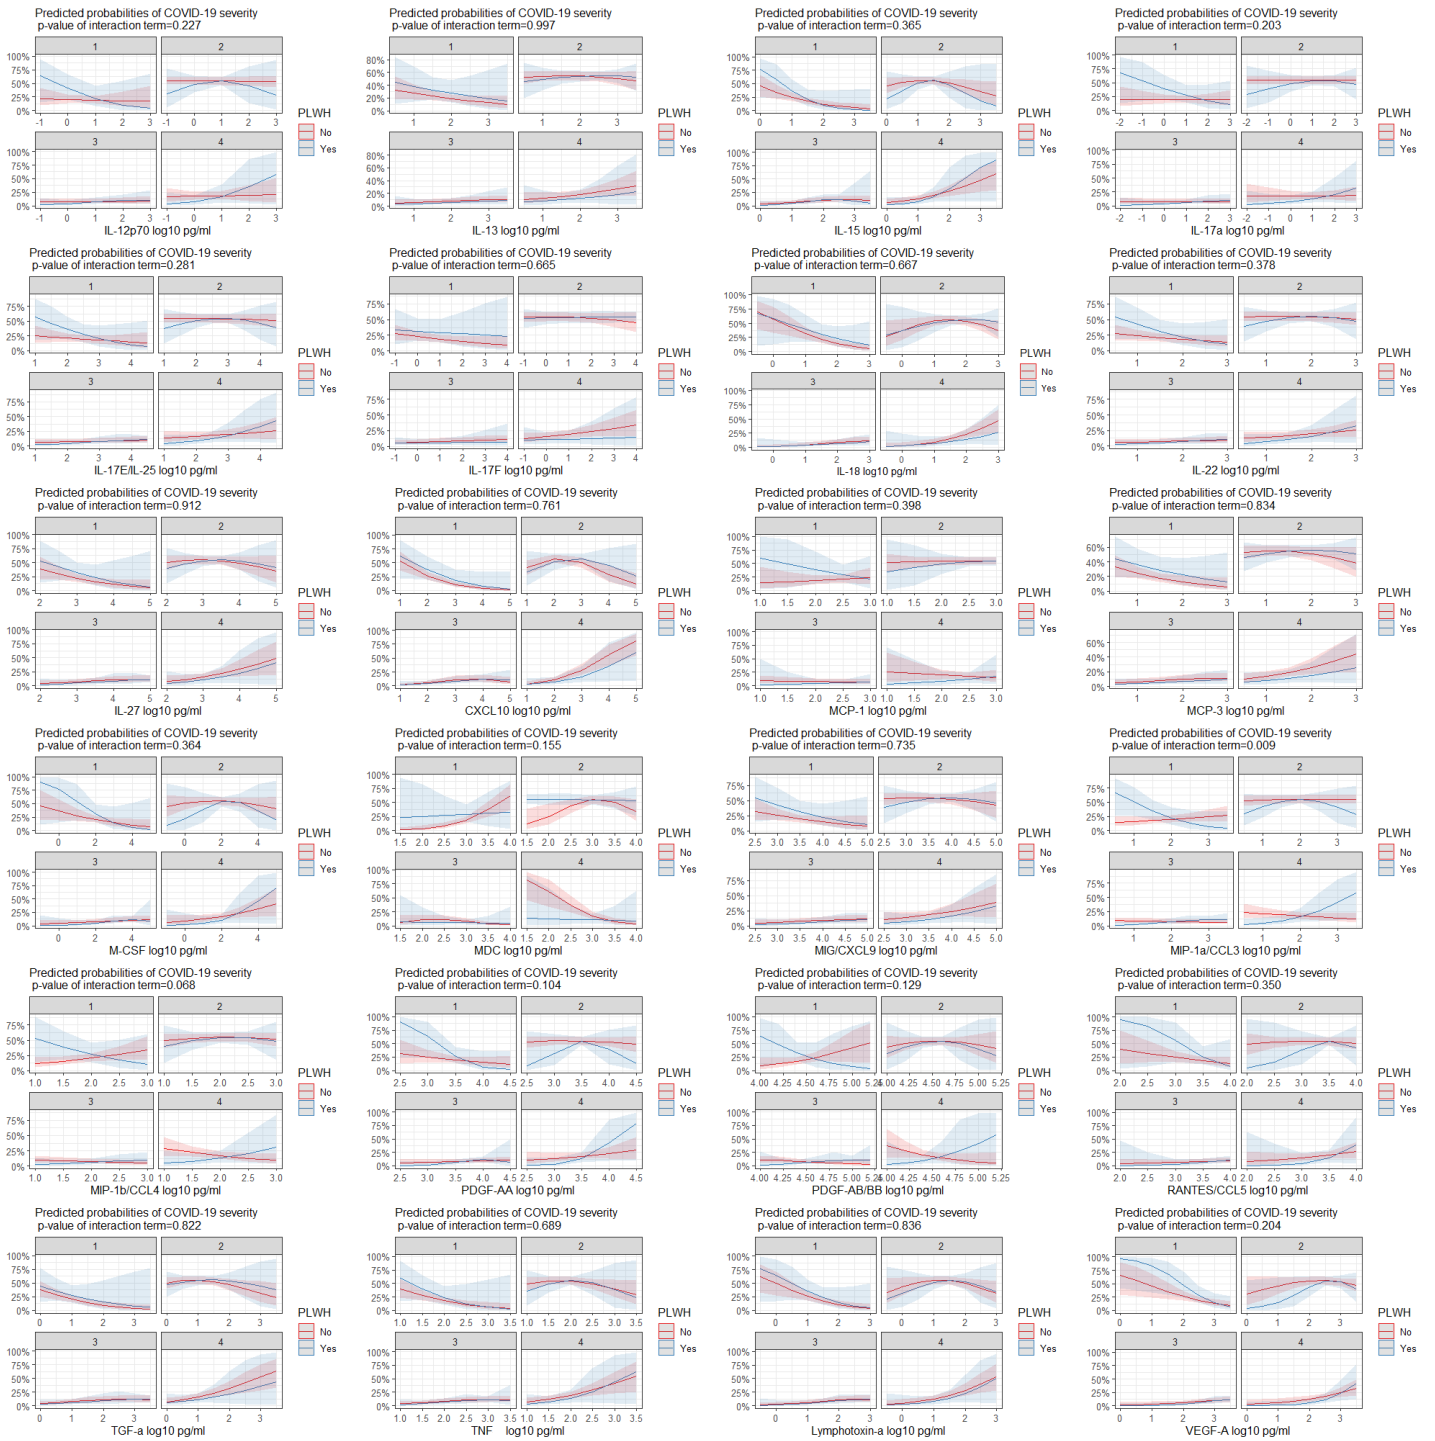

Each plot reflects multivariable proportional odds model including an interaction term for the product of log<sub>10</sub> mediator concentration and HIV status, as well as age and sex; p-values reflect two-sided Wald test of interaction term (N=302; persons living with HIV, N=33; patients living without HIV, N=269; 4 patients without definitive assessment of HIV status excluded). 1=Asymptomatic, 2=Mild, 3=Moderate, 4=Severe. Source data are provided as a Source Data file.

**Supplemental Figure 4: Inferred immune cell abundance as inferred from CIBERTSORTx digital cytometry deconvolution, stratified by COVID-19 severity (N=100).**

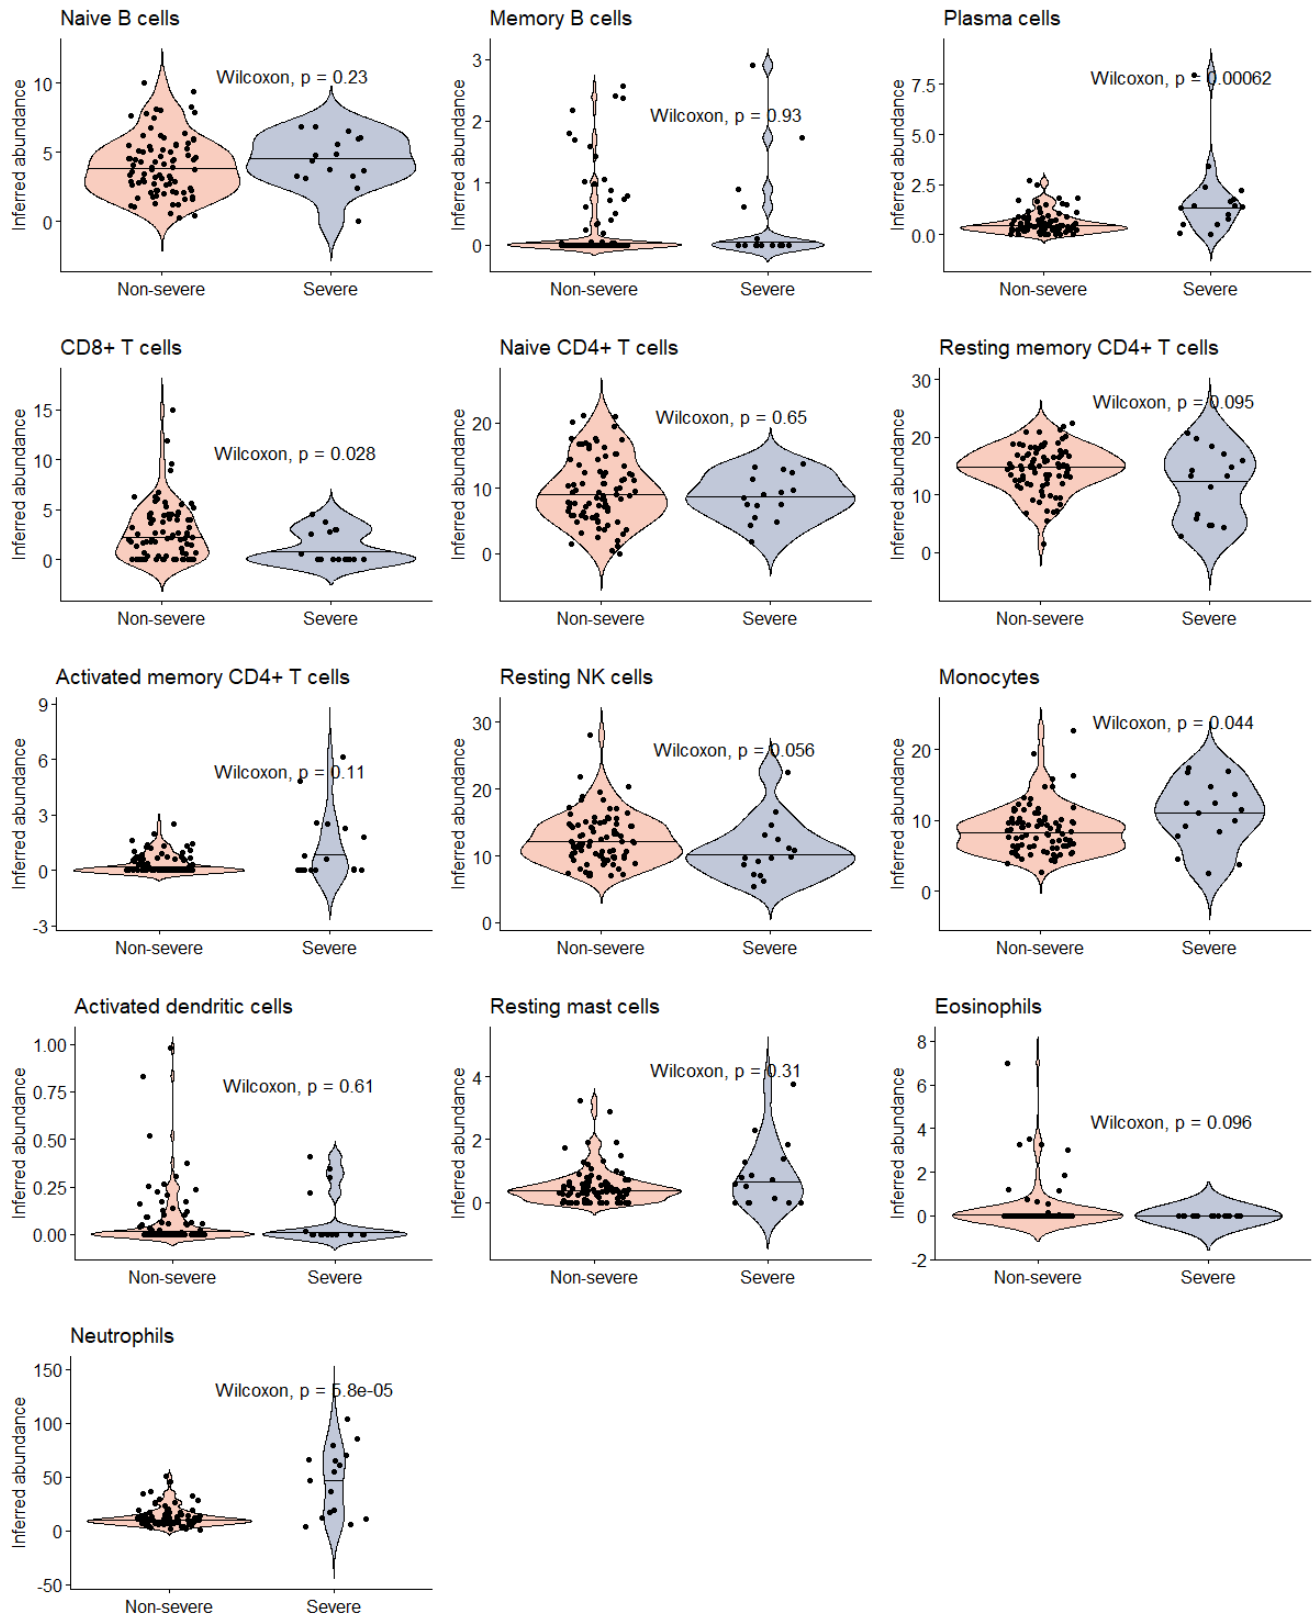

Source data are provided as a Source Data file.

**Supplemental Figure 5: Strength and expected influence for each node in clinicomolecular force-directed correlation network among patients with symptomatic COVID-19 (N=240).**

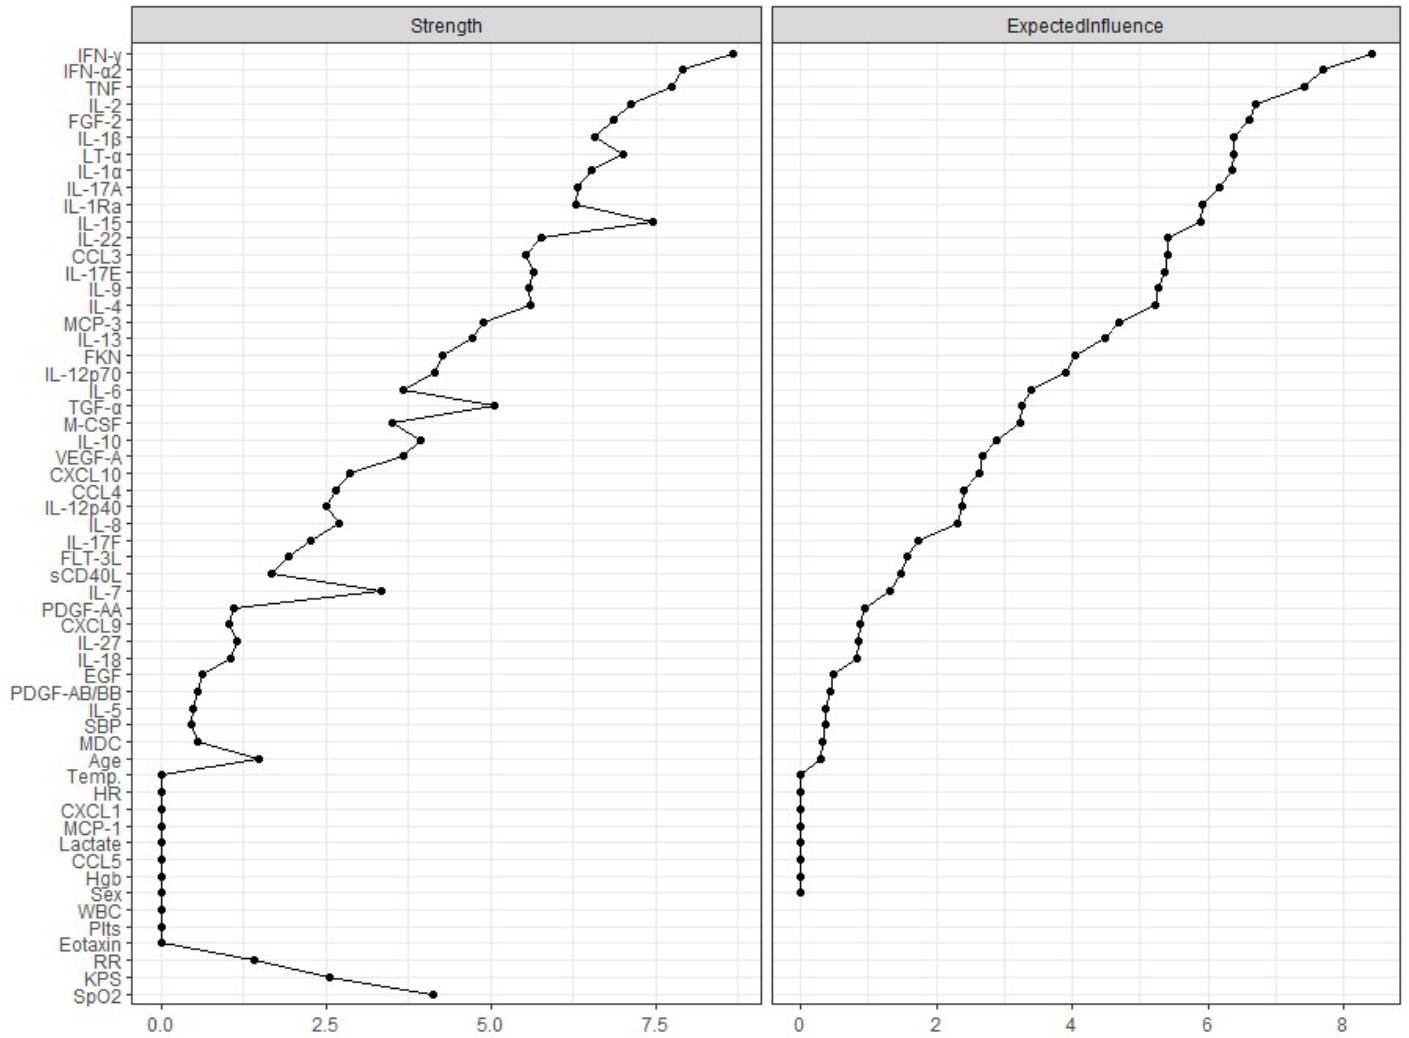

Source data are provided as a Source Data file.



**Supplemental Figure 7: Strength and expected influence for each node in clinicomolecular force-directed correlation network (with HIV status included as node) among patients with symptomatic COVID-19 (N=236; 4 patients without definitive HIV status assessment excluded).**

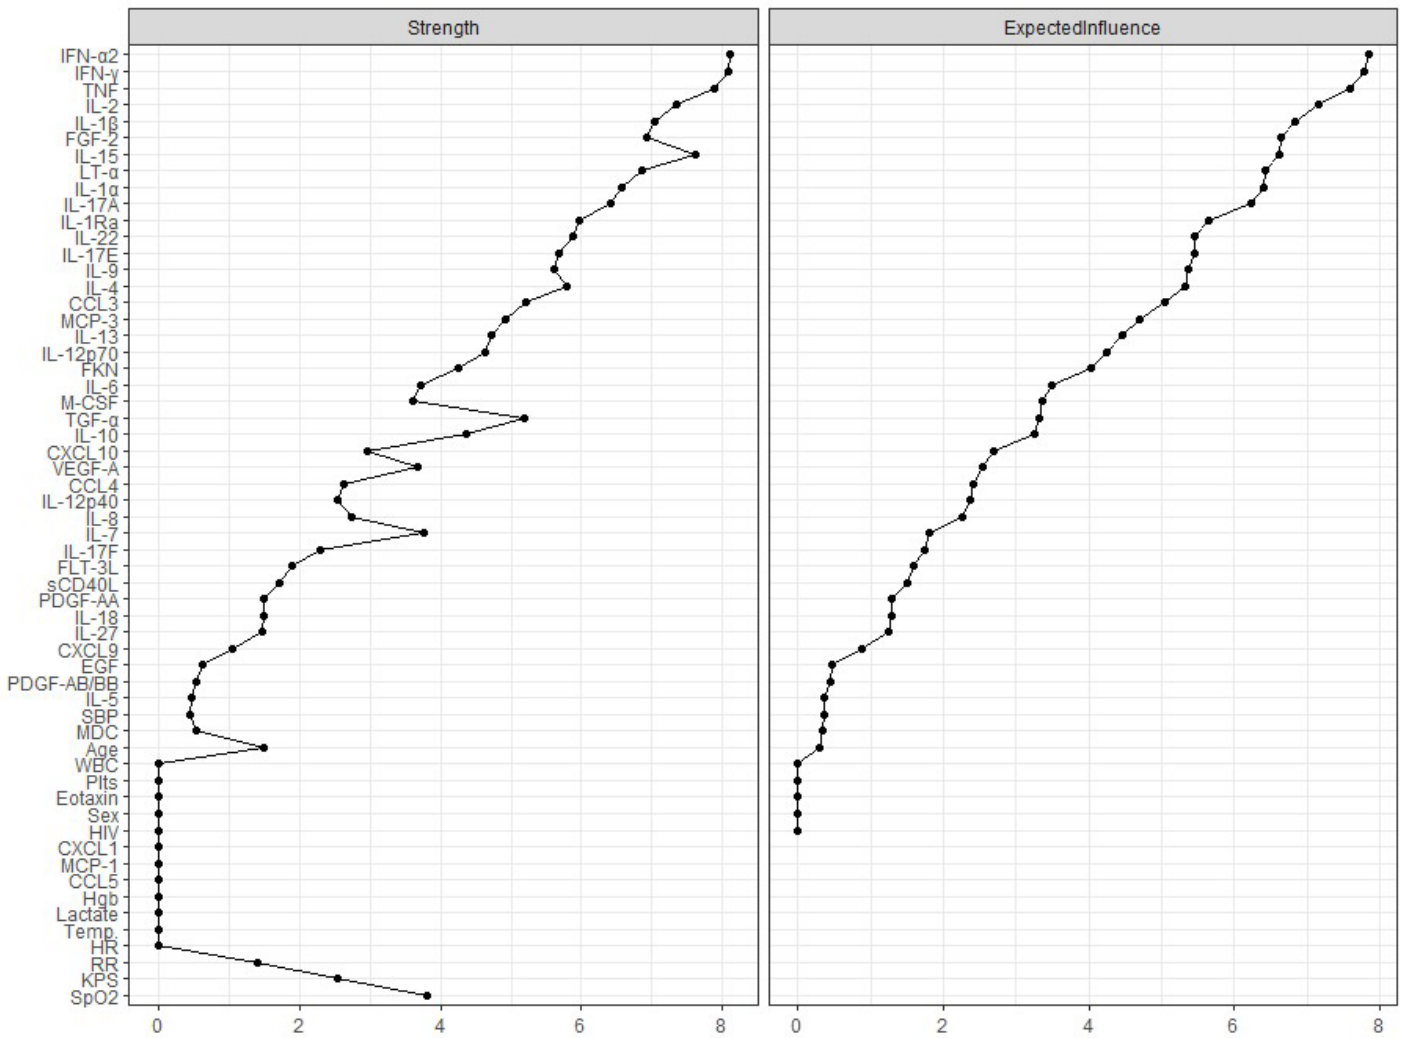

Source data are provided as a Source Data file.

Supplemental Figure 8: Unsupervised consensus k-means clustering of immune mediators in patients with symptomatic COVID-19 (N=240).

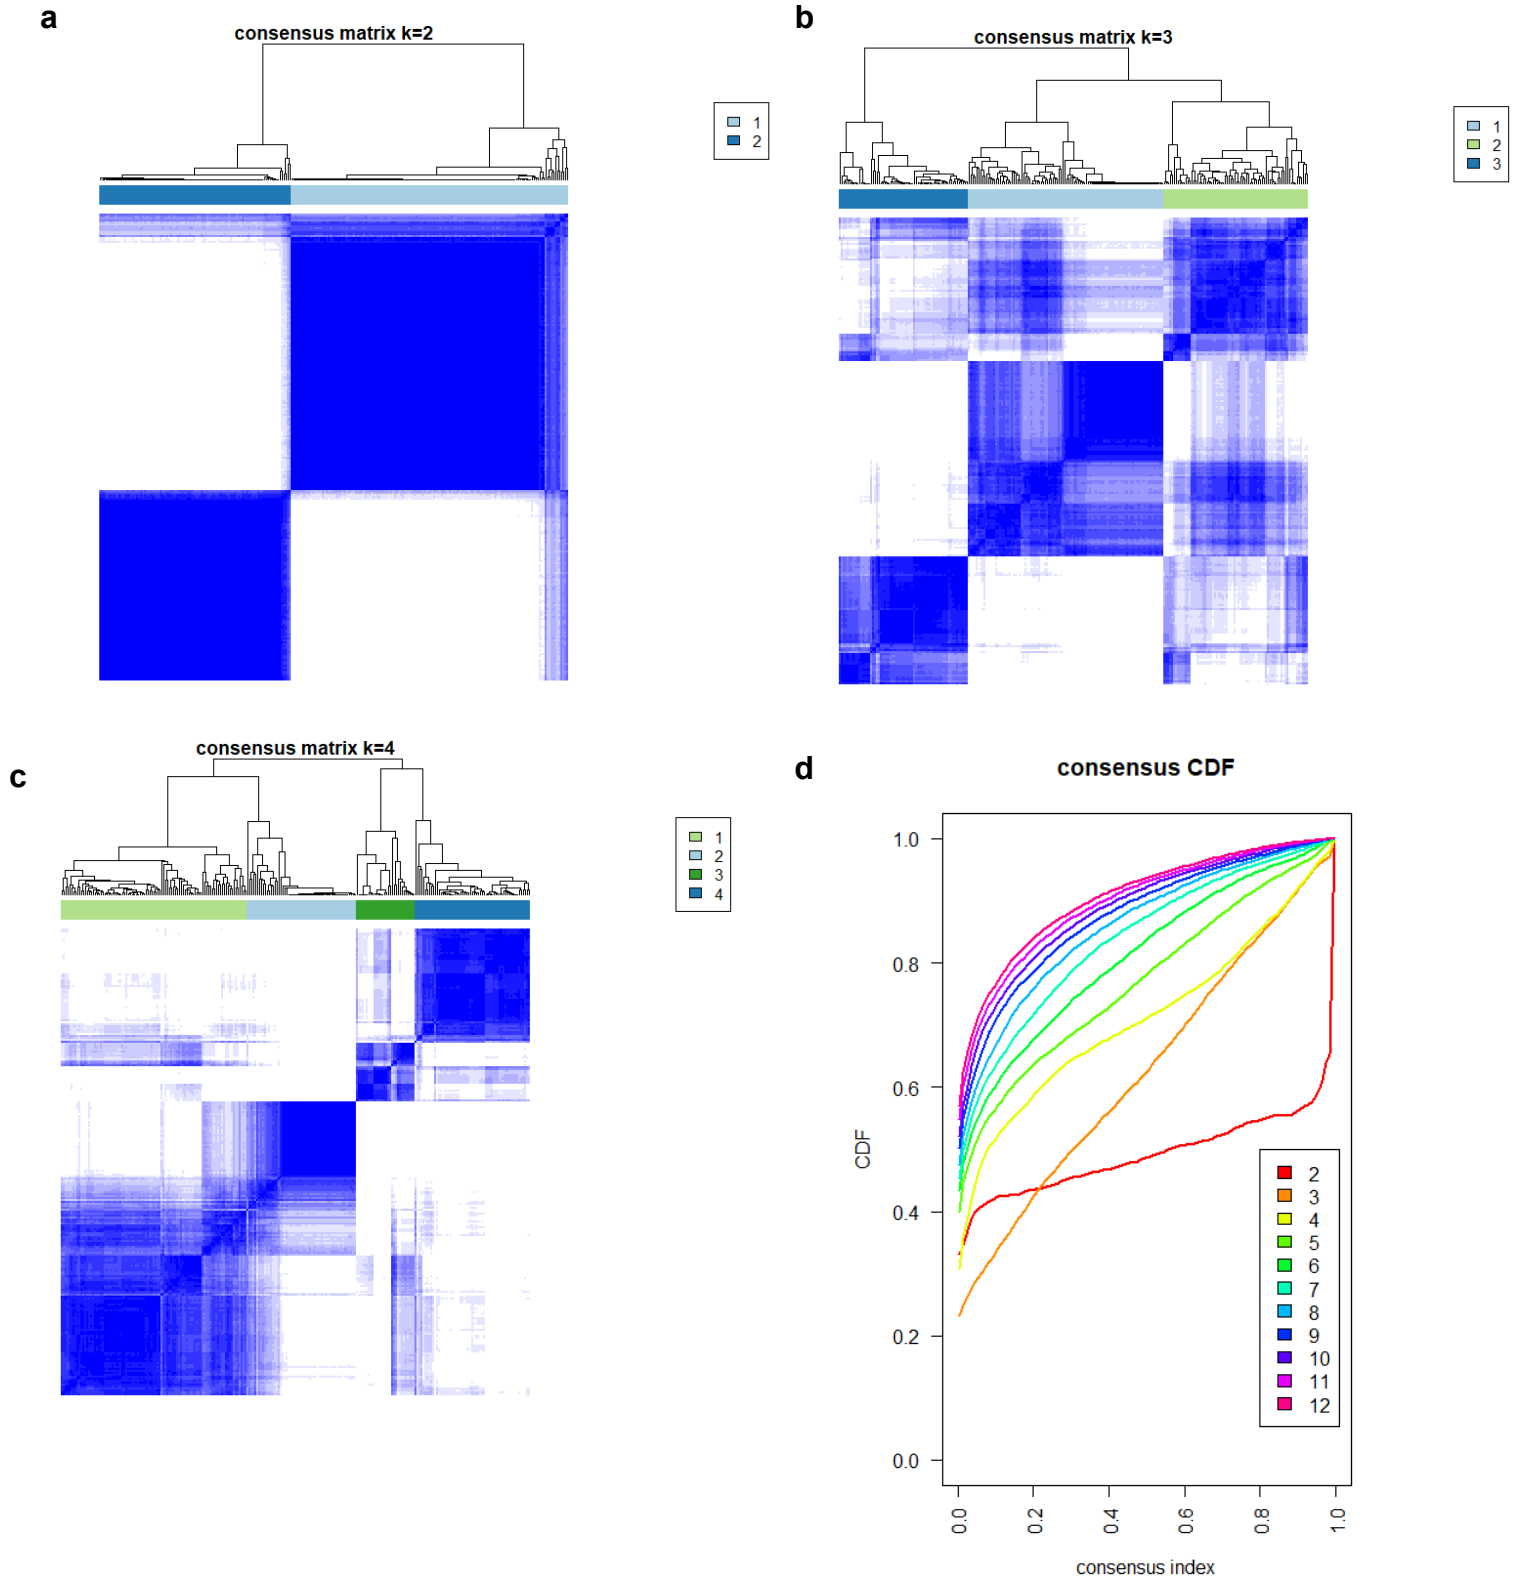



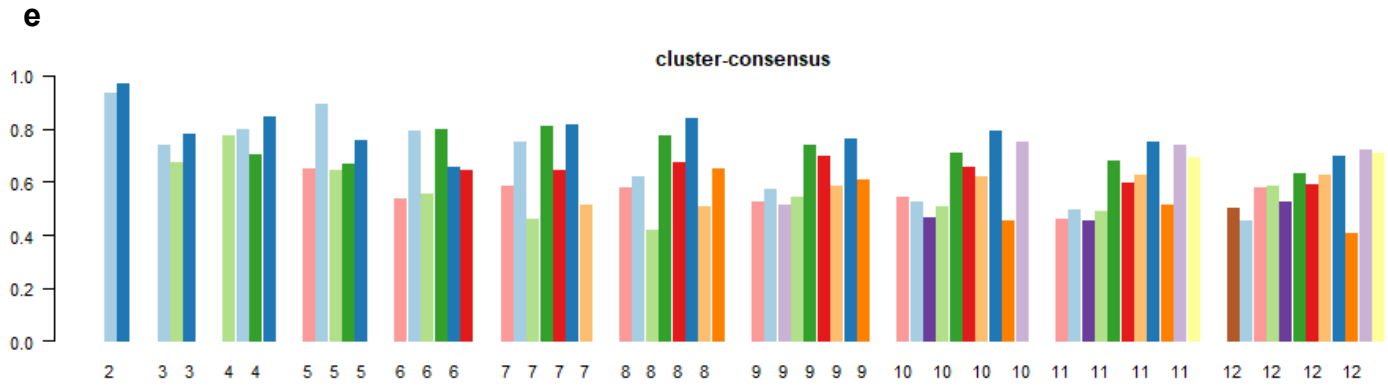

**(a-c)** Consensus matrices for cluster partitions of  $k=2$  (optimal) and other representative examples ( $k=3$  and  $k=4$ ). **(d)** Consensus cumulative distribution function (CDF) plot, in which highest and more horizontal line reflects optimally stable partition. **(e)** Cluster consensus plot showing the average pairwise item consensus values between cluster members, with higher values across all bars suggestive of optimal  $k$ . Source data are provided as a Source Data file.
